# Supplementary material
Source: PubMed Central journal article supplement (PMC5796655)
Supplement: NIHMS935501-supplement-Supplemental.pdf [file NIHMS935501-supplement-Supplemental.pdf]

## Enantiomeric recognition of D- and L-lactate by CEST with the aid of a paramagnetic shift reagent

Lei Zhang,<sup>†,||</sup> André F. Martins,<sup>†,‡,||</sup> Piyu Zhao,<sup>†</sup> Michael Tieu,<sup>†</sup> David Esteban-Gómez,<sup>§</sup> Gregory T. McCandless,<sup>†</sup> Carlos Platas-Iglesias<sup>§</sup> and A. Dean Sherry<sup>\*,†,‡</sup>

<sup>†</sup> Department of Chemistry, University of Texas at Dallas, 800 West Campbell Road, Richardson, Texas 75080, United States, <sup>‡</sup> Advanced Imaging Research Center, University of Texas Southwestern Medical Center, Dallas, Texas 75390, United States, <sup>§</sup> Departamento de Química, Facultad de Ciencias & Centro de Investigaciones Científicas Avanzadas (CICA), Universidade da Coruña, 15071 A Coruña, Spain

### Contents

|                                                                                   |     |
|-----------------------------------------------------------------------------------|-----|
| 1. General.....                                                                   | S2  |
| 2. Synthesis and characterization .....                                           | S2  |
| 3. <sup>1</sup> H NMR spectra of free Yb <sup>3+</sup> complexes.....             | S6  |
| 4. H <sub>4</sub> proton chemical shift of Yb complexes with D and L lactate..... | S6  |
| 5. Solid state X-ray crystal structure analysis of Yb <sub>3</sub> dimer.....     | S7  |
| 6. 2D COSY NMR of Yb <sub>3</sub> + L or D lactate .....                          | S8  |
| 7. DFT computational details .....                                                | S8  |
| References .....                                                                  | S31 |

\*E-mail: dean.sherry@utsouthwestern.edu; sherry@utdallas.edu

|| These authors contributed equally in this work.

# Supporting information

## 1. General

All reagents and solvents were purchased from commercial sources and used as received without other purification unless stated in the work.  $^1\text{H}$ ,  $^{13}\text{C}$  and CEST Z-spectra NMR have been recorded on a Bruker AVANCE III 400 NMR spectrometer. Temperature unit controller Model # 2416 was used to control the temperature. Hydrogenation reactions were carried out using a Parr hydrogenation apparatus. Preparative HPLC was performed on a Waters Delta prep HPLC system equipped with a Waters 2996 photodiode array detector and a Phenomenex Luna C18 column (5 mm, 30 mm  $\times$  250 mm). The final concentration of the complexes were checked by Evan's method<sup>1</sup>.

## 2. Synthesis and characterization

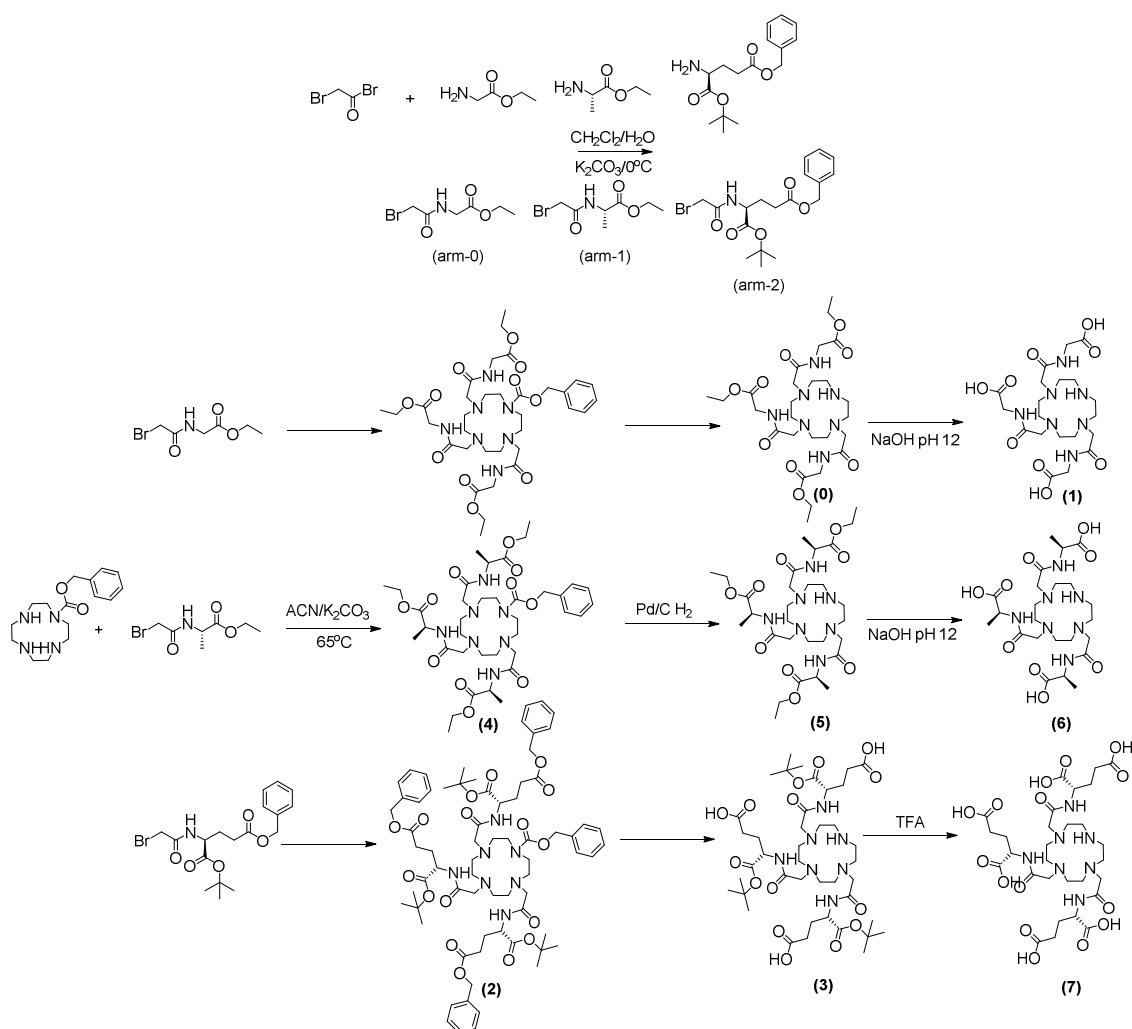

**Scheme S1.** Synthetic pathways used to obtain the final ligands studied in this work.

**N-alkyl- bromoacetamides.** Bromoacetyl bromide (1.1 equiv) was dissolved in dichloromethane (50 mL) and added dropwise to a cooled solution (0°C) on a round flask

## Supporting information

containing the amine (1 equiv) and potassium carbonate (5 equiv) in water. The biphasic mixture contains water (50 mL) and dichloromethane (100 mL). The resulting solution was allowed to warm to room temperature and stirred for 8 hours. The organic layer was washed with brine (100 mL) for three times and dried over Na<sub>2</sub>SO<sub>4</sub>. The organic phase solvents were removed under vacuum.

**N-(2-bromoacetyl) L-glycine ethyl ester (arm-0):** The title compound was prepared in an analogous manner to that described above and was obtained as a white solid. (Yield 95%). <sup>1</sup>H NMR (400 MHz, CDCl<sub>3</sub>): δ (ppm) 1.28 (3H, t, CH<sub>3</sub>), 3.91 (2H, s, BrCH<sub>2</sub>), 4.06 (2H, d, NHCH<sub>2</sub>), 4.23 (2H, q, CH<sub>2</sub>CH<sub>3</sub>), <sup>13</sup>C NMR (100 MHz, CDCl<sub>3</sub>): δ (ppm) 14.1 (CH<sub>2</sub>CH<sub>3</sub>), 28.4 (BrCH<sub>2</sub>CO), 39.7 (NHCH<sub>2</sub>CO), 61.0 (CH<sub>2</sub>CH<sub>3</sub>), 169.5 (CH<sub>2</sub>COO), 177.8 (CH<sub>2</sub>CONH).

**N-(2-bromoacetyl) L-alanine ethyl ester (arm-1):** The title compound was prepared in an analogous manner to that described for arm-0 and was obtained as a white solid. (yield 96%). <sup>1</sup>H NMR (400 MHz, CDCl<sub>3</sub>): δ (ppm) 1.29 (3H, t, CH<sub>2</sub>CH<sub>3</sub>), 1.48 (3H, d, CHCH<sub>3</sub>), 4.19 (2H, s, BrCH<sub>2</sub>CO), 4.21 (2H, q, CH<sub>2</sub>CH<sub>3</sub>), 4.35 (1H, q, NHCHCO), 8.03 (1H, s, NH). <sup>13</sup>C NMR (100 MHz, CDCl<sub>3</sub>): δ (ppm) 14.1 (CH<sub>2</sub>CH<sub>3</sub>), 17.3 (CHCH<sub>3</sub>), 28.7 (BrCH<sub>2</sub>), 51.1 (NHCHCO), 61.3 (CH<sub>2</sub>CH<sub>3</sub>), 171.5 (CHCO), 177.5 (CH<sub>2</sub>CO).

**N-(2-bromoacetyl) L-glutamic acid γ-benzyl ester α-tert-butyl ester (arm-2):** The title compound was prepared in an analogous manner to that described for arm 0 and was obtained as a colorless oil. (Yield 98%) <sup>1</sup>H NMR (400 MHz, CDCl<sub>3</sub>): δ (ppm) 1.47 (9H, s, CH<sub>3</sub>), 2.03-2.22 (2H, m, CHCH<sub>2</sub>CH<sub>2</sub>), 2.45 (2H, m, CH<sub>2</sub>CH<sub>2</sub>CO), 3.82 (2H, m, NHCH<sub>2</sub>CH), 3.85 (2H, s, BrCH<sub>2</sub>CO), 4.51 (1H, m, CH<sub>2</sub>CHCH<sub>2</sub>), 5.12 (2H, s, OCH<sub>2</sub>Ph), 7.35 (5H, m, Ph). <sup>13</sup>C NMR (100 MHz, CDCl<sub>3</sub>): δ (ppm) 27.2 (CHCH<sub>2</sub>CH<sub>2</sub>), 27.9 (CH<sub>3</sub>), 28.8 (CH<sub>2</sub>CH<sub>2</sub>CO), 30.2 (NHCHCH<sub>2</sub>), 52.6 (BrCH<sub>2</sub>), 66.7 (OCH<sub>2</sub>Ph), 82.8 (C(CH<sub>3</sub>)<sub>3</sub>), 128.6-135.8 (Ph), 165.7 (CHCOO), 170.2 (CHCOO), 172.4 (BrCH<sub>2</sub>CO).

**1,4,7,10-tetraazacyclododecane-1,4,7-tris(2-acetamidoglycine) (1):** Compound 0 was prepared using a previously reported method<sup>2</sup> with the yield of 79%. The ligand 0 (1 g, 1.6 mmol) was dissolved in water and a concentrated solution of 1N NaOH was used to change the pH to 12. The resulting solution was stirred for 12 hours and neutralized with a 1N HCl solution. The final solution was lyophilized and the solid was used in the next steps without further purification.

**1,4,7,10-tetraazacyclododecane-1,4,7-tris(2-acetamido-L-glutamic acid γ-benzyl ester α-tert-butyl ester 10-benzycarbamate (2):** 1-benzyloxycarbonyl-1,4,7,10-tetraazacyclododecane

## Supporting information

trihydrochloride (1 g, 2.4 mmol) and bromo-N-(2-acetamido- L-glutamic acid  $\gamma$ -benzyl ester  $\alpha$ -tert-butyl ester (3.04 g, 7.32 mmol) were dissolved in anhydrous CH<sub>3</sub>CN in the presence of K<sub>2</sub>CO<sub>3</sub> (2.66 g, 19 mmol). The resulting solution was stirred at 65°C for 24 hours under N<sub>2</sub> condition. The organic phase was filtered and solvents removed under vacuum. The residue was purified by chromatography using a Al<sub>2</sub>O<sub>3</sub> column eluted with 2%methanol/98% dichloromethane to afford the title compound as a white solid (2.1 g, 66%). <sup>1</sup>H NMR (400 MHz, CDCl<sub>3</sub>):  $\delta$  (ppm) 1.43 (27H, s, C(CH<sub>3</sub>)<sub>3</sub>), 2.35 (12H, m, CHCH<sub>2</sub>CH<sub>2</sub>CO), 2.5-3.0(22H, m, CH<sub>2</sub> on cyclen and NCH<sub>2</sub>CO), 3.85 (2H, s, COCH<sub>2</sub>Ph), 4.48 (3H, t, NHCHCH<sub>2</sub>), 5.09 (6H, s, OCH<sub>2</sub>Ph), 7.30-7.40 (20H, m, Ph). <sup>13</sup>C NMR (100 MHz, CDCl<sub>3</sub>):  $\delta$  (ppm) 27.5 (CHCH<sub>2</sub>CH<sub>2</sub>), 27.9 (C(CH<sub>3</sub>)<sub>3</sub>), 30.57 (CH<sub>2</sub>CH<sub>2</sub>CO), 30.59 (COCH<sub>2</sub>), 49-55 (ring CH<sub>2</sub>), 57.8 (CH), 58.9 (NCH<sub>2</sub>CO), 66.4 (OCH<sub>2</sub>Ph), 82.3 (C(CH<sub>3</sub>)<sub>3</sub>), 129-138 (Ph), 156.6 (NCOCH<sub>2</sub>), 170.0 (CH<sub>2</sub>CONH), 171.1 (CHCOO), 172.4 (OCOCH<sub>2</sub>).

**1,4,7,10- tetraazacyclododecane- 1,4,7 -tris(2-acetamido- L-glutamic acid  $\alpha$ -tert-butyl ester) (3):** compound 2 (2.1 g, 1.6 mmol) was dissolved in ethanol and transferred to a flask with 20% palladium on carbon (wt %). The mixture was shaken on a Parr hydrogenator under a hydrogen pressure of 50 psi for 10 hours at room temperature. The resulting solution was filtered and solvent was removed under vacuum to afford the title compound as a colorless solid (1.4 g, 96%). <sup>1</sup>H NMR (400 MHz, CDCl<sub>3</sub>):  $\delta$  (ppm) 1.41 (27H, m, C(CH<sub>3</sub>)<sub>3</sub>), 2.17-2.65 (28H, m, ring CH<sub>2</sub>, CHCH<sub>2</sub>CH<sub>2</sub>CO), 3.25 (6H, s, NCH<sub>2</sub>CO), 4.55 (3H, t, NHCHCH<sub>2</sub>), 8.03 (3H, s, NH). <sup>13</sup>C NMR (100 MHz, CDCl<sub>3</sub>):  $\delta$  (ppm) 27.0 (CHCH<sub>2</sub>CH<sub>2</sub>), 27.4 (C(CH<sub>3</sub>)<sub>3</sub>), 31.1 (CH<sub>2</sub>CH<sub>2</sub>CO), 41-55 (ring CH<sub>2</sub>), 57.8 (CH), 59.9 (NCH<sub>2</sub>CO), 84.0 (C(CH<sub>3</sub>)<sub>3</sub>), 164.8 (CH<sub>2</sub>CONH), 171.3 (OCOCH<sub>2</sub>), 177.7 (COO).

**1,4,7,10- tetraazacyclododecane- 1,4,7 -tris(2-acetamido) L-alanine ethyl ester 10-benzyl carbamate (4):** 1-benzyloxycarbonyl-1,4,7,10- tetraazacyclododecane trihydrochloride (1 g, 2.4 mmol) and N-(2-bromoacetyl) - L- alanine ethyl ester (1.75 g, 7.3 mmol) were dissolved in anhydrous CH<sub>3</sub>CN in the presence of 8 equivalents of NaHCO<sub>3</sub> (1.61 g, 19 mmol). The resulting solution was stirred at 65°C for 24 hours under N<sub>2</sub> condition and then the organic phase was filtered and solvents removed under vacuum. The residue was purified by chromatography using a Al<sub>2</sub>O<sub>3</sub> column eluted with 2%methanol/98% dichloromethane to afford the title compound as a colorless oil (1.0 g, 53%). <sup>1</sup>H NMR (400 MHz, CDCl<sub>3</sub>):  $\delta$  (ppm) 1.21-1.33 (18H, m, CHCH<sub>3</sub>, CH<sub>2</sub>CH<sub>3</sub>), 2.16-3.28 (16H, m, ring CH<sub>2</sub>), 3.25 (6H, s, NCH<sub>2</sub>CO), 4.12-4.48 (9H, m, CH, CH<sub>2</sub>CH<sub>3</sub>), 5.04 (2H, s, PhCH<sub>2</sub>O), 7.28-7.53 (8H, m, Ph, NH). <sup>13</sup>C NMR (100 MHz, CDCl<sub>3</sub>):  $\delta$  (ppm) 14.3 (CH<sub>2</sub>CH<sub>3</sub>), 18.2 (CHCH<sub>3</sub>), 44-55 (ring CH<sub>2</sub> CH), 59.5 (NCH<sub>2</sub>CO), 61.2 (CH<sub>2</sub>CH<sub>3</sub>), 67.5 (PhCH<sub>2</sub>O), 127-136 (Ph), 156.2 (NCOO), 170.8 (CH<sub>2</sub>CO), 173.1 (CHCOO).

**1,4,7,10- tetraazacyclododecane- 1,4,7 -tris(2-acetamido) L-alanine ethyl ester (5):** compound 4 (1.0 g, 1.2 mmol) was dissolved in ethanol (50 ml). 20% palladium on carbon (wt %) was then added. The reaction mixture was shaken on a Parr hydrogenator under a hydrogen pressure of 50 psi for 10 hours at room temperature. The resulting mixture was filtered and

## Supporting information

solvents removed under vacuum to afford the title compound as a colorless oil (0.56 g, 67%).  $^1\text{H}$  NMR (400 MHz,  $\text{CDCl}_3$ ):  $\delta$  (ppm) 1.12 -1.38 (18H, m,  $\text{CHCH}_3$ ,  $\text{CH}_2\text{CH}_3$ ), 2.46-2.96 (16H, m, ring  $\text{CH}_2$ ), 3.25 (6H, s,  $\text{NCH}_2\text{CO}$ ), 4.11-4.46 (9H, m,  $\text{CH}$ ,  $\text{CH}_2\text{CH}_3$ ), 7.93 (3H, s,  $\text{NH}$ ).  $^{13}\text{C}$  NMR (100 MHz,  $\text{CDCl}_3$ ):  $\delta$  (ppm) 17.4 ( $\text{CH}_2\text{CH}_3$ ), 17.7 ( $\text{CHCH}_3$ ), 44-55 (ring  $\text{CH}_2$ ,  $\text{CH}$ ), 57.2 ( $\text{NCH}_2\text{CO}$ ), 59.5 ( $\text{CH}_2\text{CH}_3$ ), 171.0 ( $\text{NCOO}$ ), 172.0 ( $\text{CH}_2\text{CO}$ ), 173.2 ( $\text{CHCOO}$ ).

**1,4,7,10- tetraazacyclododecane- 1,4,7 –tris(2-acetamido) L-alanine (6):** compound 5 (0.56 g, 0.86 mmol) was dissolved in  $\text{H}_2\text{O}$ . Slowly change the pH to 12 using 1N NaOH solution and leave the reaction for 16 hours at room temperature. The residue was then lyophilized to afford title compound as a white solid (310 mg, 63%).  $^1\text{H}$  NMR (400 MHz,  $\text{D}_2\text{O}$ ):  $\delta$  (ppm) 1.36 (9H, d,  $\text{CHCH}_3$ ), 2.46-2.65 (16H, m, ring  $\text{CH}_2$ ), 3.25 (6H, s,  $\text{NCH}_2\text{CO}$ ), 4.19 (3H, q,  $\text{CHCH}_3$ ), 8.03 (3H, s,  $\text{NH}$ ).  $^{13}\text{C}$  NMR (100 MHz,  $\text{D}_2\text{O}$ ):  $\delta$  (ppm) 17.5 ( $\text{CHCH}_3$ ), 45.2-55.1 (ring  $\text{CH}_2$ ,  $\text{CH}$ ), 58.1 ( $\text{NCH}_2\text{CO}$ ), 172.8 ( $\text{CH}_2\text{CONH}$ ), 180.3 ( $\text{COO}$ ).

**1,4,7,10- tetraazacyclododecane- 1,4,7 –tris(2-acetamido) L- glutamic acid (7):** compound 3 (1.4 g, 1.5 mmol) was reacted directly with 4 mL TFA for 8 hours. Solvent was then removed under vacuum and the final compound was obtained as a yellow oil (900 mg, 79%).  $^1\text{H}$  NMR (400 MHz,  $\text{D}_2\text{O}$ ):  $\delta$  (ppm) 2.17 (6H, m,  $\text{CHCH}_2\text{CH}_2$ ), 2.40- 2.60 (m, cyclen ring  $\text{CH}_2$  plus  $\text{CH}_2\text{COO}^-$ ), 3.25 (6H, s,  $\text{NHCH}_2$ ), 4.45 (3H, t,  $\text{NHCH}$ ).  $^{13}\text{C}$  NMR (100 MHz,  $\text{D}_2\text{O}$ ):  $\delta$  (ppm) 28 ( $\text{CHCH}_2$ ), 31.9 ( $\text{CHCH}_2\text{CH}_2$ ), 45.2-65.2 (cyclen rings  $\text{CH}_2$ ,  $\text{NCH}_2$  and  $\text{CH}$ ), 170-183 ( $\text{CHCOO}^-$ ,  $\text{CH}_2\text{COO}^-$  and  $\text{CONH}$ ).

### General procedure for the preparation of $\text{Yb}^{3+}$ complexes.

**Yb (III)- 1,4,7,10- tetraazacyclododecane- 1,4,7 –tris(2-acetamido) L-Glutamic acid  $\alpha$ -tert-butyl ester (Yb1):** The ligand was dissolved in acetonitrile or  $\text{H}_2\text{O}$  and 0.95 equivalents of  $\text{YbCl}_3$  were added. Concentrated solutions of 1N NaOH and 1N HCl were used to adjust the pH to 5.5~6.0. Xylenol Orange tests were performed until no free metal was detected. Samples were filtered using 2  $\mu\text{m}$  membrane filter for further experiment. Stock solutions were prepared with miliQ Water.  $m/z$  (ESI- $\text{MS}^+$ ) : 904 ( $\text{M}+\text{H}$ ) $^+$ .

**Yb (III)- 1,4,7,10- tetraazacyclododecane- 1,4,7 –tris(2-acetamido) L-alanine ethyl ester (Yb2):** complex was synthesized in an analogous manner to that described for Yb 1 using ligand 5. The title compound was obtained as a colorless solid.  $m/z$  (ESI- $\text{MS}^+$ ) : 734 ( $\text{M}+\text{H}$ ) $^+$ .

**Yb (III)- 1,4,7,10- tetraazacyclododecane- 1,4,7 –tris(2-acetamido) L-alanine (Yb3):** complex was synthesized in an analogous manner to that described for Yb 1 using ligand 6. The title compound was obtained as a colorless solid.  $m/z$  (ESI- $\text{MS}^+$ ) : 790 ( $\text{M}+\text{H}$ ) $^+$ .

## Supporting information

**Yb (III)- 1,4,7,10- tetraazacyclododecane- 1,4,7 –tris(2-acetamido) L- glutamic acid (Yb4):** complex was synthesized in an analogous manner to that described for Yb 1 using ligand 7. The title compound was obtained as a colorless solid .m/z (ESI-MS<sup>+</sup>) :846 (M+H)<sup>+</sup>.

### 3. <sup>1</sup>H NMR spectra of free Yb<sup>3+</sup> complexes.

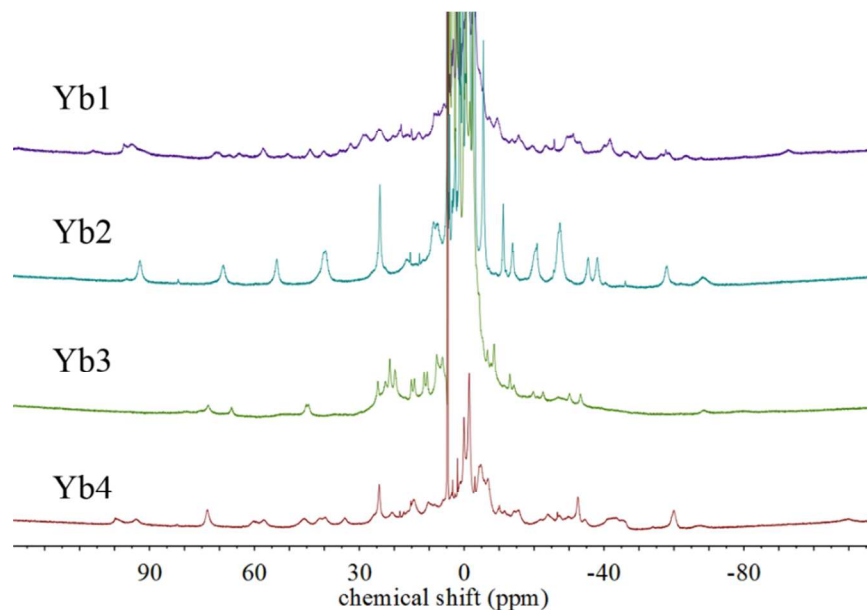

**Figure S1.** Proton NMR of Yb<sub>1-4</sub> complexes (50 mM) in the absence of lactate. Samples were dissolved in D<sub>2</sub>O.

### 4. H<sub>4</sub> proton chemical shift of Yb complexes with D and L lactate.

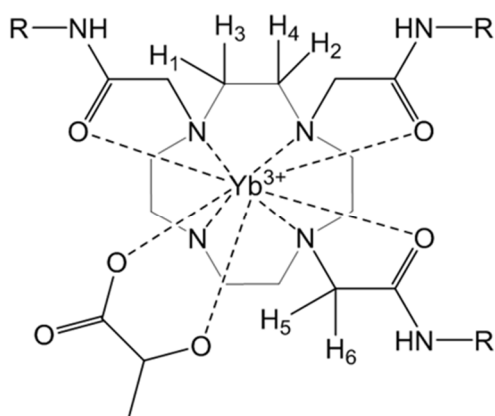

**Figure S2.** Schematic representation of the Yb-lac complex with the proton number assignments (H<sub>1-6</sub>).

## Supporting information

**Table S1.** Chemical shifts of all four ethylene proton resonances in the five Yb<sub>x</sub> complexes with D- and L-lactate. The most highly shifted downfield resonance is assigned to the axial H<sub>4</sub> proton. All NMR spectra were recorded at 25°C in D<sub>2</sub>O at 9.4 T. pD = 6.5

|     | L-lactate (ppm) |           |           |           | D-lactate (ppm) |           |           |           |
|-----|-----------------|-----------|-----------|-----------|-----------------|-----------|-----------|-----------|
| Yb0 | 101.3/100.5     | 77.2/75.4 | 67.1/66.3 | 53.6/52.1 | 101.3/100.5     | 77.2/75.4 | 67.1/66.3 | 53.6/52.1 |
| Yb1 | 84.7            | 68.9      | 42.1      | 41.0      | 82.9            | 67.8      | 43.7      | 39.2      |
| Yb2 | 85.3            | 65.2      | 47.6      | 41.0      | 85.8            | 67.1      | 50.0      | 43.7      |
| Yb3 | 98.1            | 75.7      | 65.0      | 52.8      | 96.9            | 73.2      | 64.3      | 50.5      |
| Yb4 | 97.4            | 74.3      | 62.6      | 50.4      | 95.8            | 72.1      | 61.5      | 48.1      |

### 5. Solid state X-ray crystal structure analysis of Yb<sub>3</sub> dimer

A colorless crystal was obtained by slow evaporation of diethyl ether into a vial containing a concentrated solution of Yb<sub>3</sub> complex and L-lactate (1:1) dissolved in water and methanol (4:1).

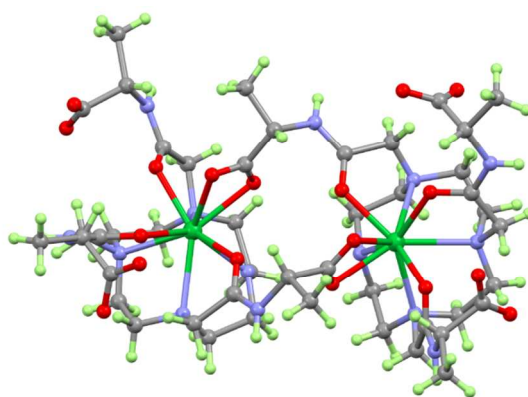

**Figure S3.** ORTEP representation of Yb<sub>3</sub> dimer. One of the carboxylates on the side arms would coordinate to another Yb<sub>3</sub> complex metal ion to form a dimer.

**Note:** the crystal growth attempt yielding crystals of the Yb<sub>3</sub> dimer was adjusted to pH 7.4.

The crystal structure presented is based on data that does not meet the standards set forth by the crystallographic community (as judged with the online checkCIF as a guide). However, a rough model of the data does provide identification evidence of the Yb<sub>3</sub> dimer. This rough model (using orthorhombic space group C222) has the following unit cell parameters based on single crystal X-ray diffraction data collected at T = 100 K:

$$a = 19.329 (5) \text{ \AA}, b = 46.225 (12) \text{ \AA}, c = 19.127 (5) \text{ \AA}, V = 17090 (8) \text{ \AA}^3$$

## 6. 2D COSY NMR of Yb<sub>3</sub> + L or D lactate

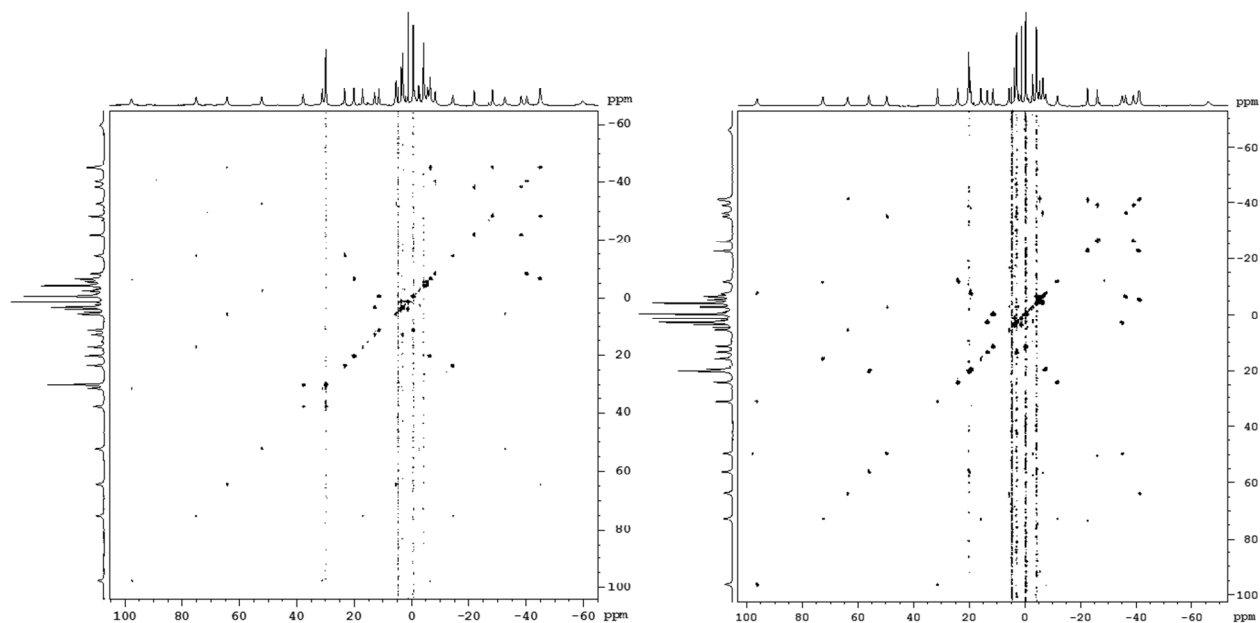

**Figure S4.** 2D COSY NMR of Yb<sub>3</sub> with L-lactate (left) or D-lactate (right). The samples contained equimolar Yb<sub>3</sub>:lactate concentrations in D<sub>2</sub>O.

## 7. DFT computational details

**Table S2.** Comparison of the experimental and calculated (using Eq 1) <sup>1</sup>H NMR shifts (ppm) of L-lactate•Yb<sub>3</sub> and D-lactate•Yb<sub>3</sub> and axial and rhombic contributions to the observed pseudocontact shifts.<sup>a</sup>

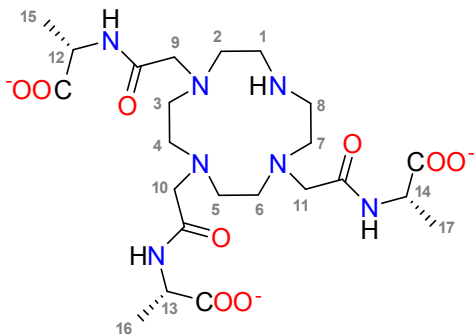

|                  | L-lactate•Yb <sub>3</sub> |            |                                 |                                 | D-lactate•Yb <sub>3</sub> |            |                                 |                                 |
|------------------|---------------------------|------------|---------------------------------|---------------------------------|---------------------------|------------|---------------------------------|---------------------------------|
|                  | Experimental              | Calculated | $\delta_i^{\text{pse}}$ (axial) | $\delta_i^{\text{pse}}$ (rhomb) | Experimental              | Calculated | $\delta_i^{\text{pse}}$ (axial) | $\delta_i^{\text{pse}}$ (rhomb) |
| H <sub>1ax</sub> | 75.17                     | 75.21      | -13.98                          | -58.13                          | 72.72                     | 72.07      | -17.45                          | -51.52                          |
| H <sub>1eq</sub> | 17.07                     | 20.53      | -2.21                           | -15.22                          | 18.85                     | 19.08      | 2.92                            | -18.90                          |



## Supporting information

|                                                          |        |            |          |          |        |            |          |          |
|----------------------------------------------------------|--------|------------|----------|----------|--------|------------|----------|----------|
| H <sub>2ax</sub>                                         | -14.45 | -14.45     | -23.00   | 40.56    | -11.78 | -10.90     | 30.00    | -15.99   |
| H <sub>2eq</sub>                                         | 23.39  | 24.89      | -13.06   | -8.73    | 24.14  | 26.16      | -1.36    | -21.70   |
| H <sub>3ax</sub>                                         | 91.71  | 88.27      | -19.56   | -71.80   | 96.35  | 92.41      | -25.30   | -64.00   |
| H <sub>3eq</sub>                                         | 31.19  | 32.42      | -4.12    | -25.20   | 31.43  | 33.25      | -14.78   | -15.37   |
| H <sub>4ax</sub>                                         | -6.48  | -6.94      | 27.73    | -17.69   | -7.51  | -6.95      | -12.69   | 22.74    |
| H <sub>4eq</sub>                                         | 20.14  | 20.72      | 3.70     | -21.32   | 19.55  | 19.92      | -3.84    | -12.98   |
| H <sub>5ax</sub>                                         | 64.37  | 62.26      | -20.18   | -38.98   | 63.72  | 59.10      | -6.63    | -49.37   |
| H <sub>5eq</sub>                                         | 5.39   | 7.54       | -6.91    | -2.47    | 5.69   | 6.31       | 12.02    | -15.23   |
| H <sub>6ax</sub>                                         | -44.94 | -41.50     | -21.02   | 65.62    | -40.90 | -39.0      | 34.47    | 7.67     |
| H <sub>6eq</sub>                                         | -6.48  | -3.90      | -11.96   | 18.96    | -6.55  | -3.66      | 5.89     | 0.88     |
| H <sub>7ax</sub>                                         | 52.27  | 49.47      | -11.61   | -34.77   | 49.68  | 45.49      | -21.23   | -21.16   |
| H <sub>7eq</sub>                                         | -2.46  | -0.48      | 1.63     | 1.95     | -2.80  | -1.03      | -12.34   | 16.47    |
| H <sub>8ax</sub>                                         | -32.52 | -31.89     | 38.41    | -3.42    | -35.01 | -33.38     | -18.38   | 54.87    |
| H <sub>8eq</sub>                                         | 5.39   | 8.46       | 11.18    | -16.54   | 3.04   | 5.91       | -9.93    | 7.12     |
| H <sub>9ax</sub>                                         | -40.26 | -45.71     | -16.84   | 65.65    | -36.23 | -40.06     | 7.32     | 35.84    |
| H <sub>9eq</sub>                                         | -8.23  | -6.87      | 0.12     | 28.46    | -5.53  | -3.76      | -10.08   | 16.93    |
| H <sub>10ax</sub>                                        | -38.28 | -42.26     | 38.41    | -3.42    | -41.24 | -45.05     | 18.74    | 29.40    |
| H <sub>10eq</sub>                                        | -21.86 | -19.93     | 7.59     | 15.44    | -26.04 | -21.19     | 22.93    | 1.37     |
| H <sub>11ax</sub>                                        | -44.94 | -48.20     | -21.02   | 65.62    | -39.08 | -41.28     | 8.78     | 35.60    |
| H <sub>11eq</sub>                                        | -28.26 | -25.48     | 0.12     | 28.46    | -22.51 | -22.73     | -6.91    | 32.74    |
| H <sub>12</sub>                                          | -5.60  | -4.32      | 8.29     | 0.21     | -6.55  | -4.42      | -10.24   | 18.83    |
| H <sub>13</sub>                                          | 11.39  | 10.90      | -3.82    | 4.56     | 11.48  | 10.90      | 6.24     | -12.96   |
| H <sub>14</sub>                                          | 12.91  | 11.93      | 4.56     | -12.31   | 13.52  | 13.05      | -9.63    | 0.75     |
| H <sub>15</sub>                                          | -4.21  | <i>c</i>   | <i>c</i> | <i>c</i> | -4.15  | <i>c</i>   | <i>c</i> | <i>C</i> |
| H <sub>16</sub>                                          | -0.57  | <i>c</i>   | <i>c</i> | <i>c</i> | -0.30  | <i>c</i>   | <i>c</i> | <i>C</i> |
| H <sub>17</sub>                                          | 3.12   | <i>c</i>   | <i>c</i> | <i>c</i> | 3.04   | <i>c</i>   | <i>c</i> | <i>C</i> |
| CH <sub>lact.</sub>                                      | 37.84  | 33.73      | -14.32   | -15.32   | 56.09  | 57.80      | -8.42    | -45.28   |
| CH <sub>3lact.</sub>                                     | 29.94  | 28.80      | -7.55    | -19.94   | 20.20  | 22.54      | -5.45    | -15.79   |
| NH                                                       | -59.68 | -62.15     | 51.46    | 14.73    | -65.91 | -68.19     | 49.58    | 22.66    |
| $[\chi_{zz} - 1/3(\chi_{xx} + \chi_{yy} + \chi_{zz})]^b$ |        | 1130 ± 48  |          |          |        | 1279 ± 57  |          |          |
| $(\chi_{xx} - \chi_{yy})^b$                              |        | -3825 ± 86 |          |          |        | -3501 ± 90 |          |          |

<sup>a</sup> The diamagnetic shifts were estimated to be 4.10 and 1.31 ppm for lactate CH and methyl protons, respectively, 1.32 ppm for the methyl protons of the ligand, 4.18 ppm for protons H12, H13 and H14, 4.04 ppm for amine NH protons and 3.1 ppm for the remaining protons. <sup>b</sup> In ppm×Å<sup>3</sup>. <sup>c</sup> Not included in the analysis.

## Supporting information

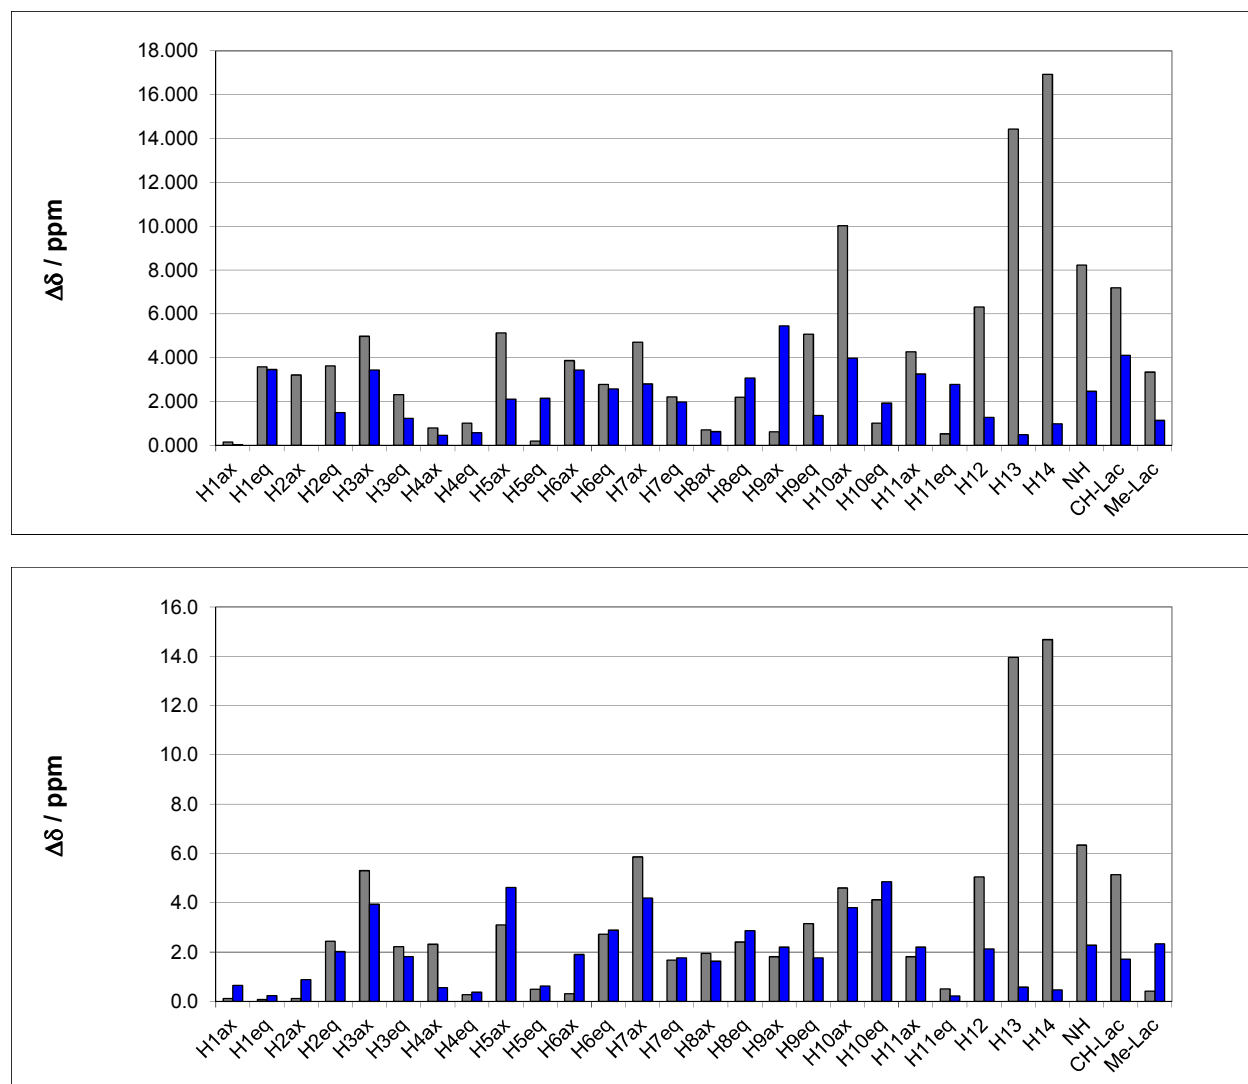

**Figure S5.** Absolute differences (ppm) between the experimental and calculated pseudocontact shifts obtained for the  $S\text{-}\Lambda(\delta\delta\delta\delta)$  (blue bars) and  $S\text{-}\Delta(\lambda\lambda\lambda\lambda)$  (grey bars) isomers of L-lactate•Yb<sub>3</sub> (top) and D-lactate•Yb<sub>3</sub> (bottom).

### Computational Details

Geometry optimizations were performed using the hybrid meta-GGA approximation to DFT with the TPSSH exchange-correlation functional,<sup>3</sup> and the Gaussian 09 package (Revision E.01).<sup>4</sup> The large-core relativistic effective core potential (LCRECP) of Dolg *et al.* and the related [5s4p3d]-GTO valence basis set were used for Yb,<sup>5</sup> together with the standard 6-311G(d,p) basis set for all remaining atoms. The LCRECP approach includes 46+4f<sup>13</sup> electrons of Yb(III) in the core, and thus calculations were conducted on a pseudo-singlet state configuration. No symmetry constraints have been imposed during the optimizations. The default values for the integration grid (75 radial shells and 302 angular points) and the SCF energy convergence criteria ( $10^{-8}$ ) were used in all calculations. The stationary points found on the potential energy

## Supporting information

surfaces were confirmed to represent local energy minima using frequency analysis (0 imaginary frequencies). Solvent effects (water) were included by using the integral equation formalism variant of the polarizable continuum model (IEFPCM).<sup>6</sup>

### Optimized Cartesian Coordinates obtained with DFT calculations

$\Lambda(\delta\delta\delta\delta)$ , D-lactate•Yb<sub>0</sub>, 0 imaginary frequencies

| Center<br>Number | Atomic<br>Number | Coordinates (Angstroms) |           |           |
|------------------|------------------|-------------------------|-----------|-----------|
|                  |                  | X                       | Y         | Z         |
| 1                | 70               | 0.026748                | -0.594166 | -0.214257 |
| 2                | 8                | 2.262815                | -0.604988 | 0.517192  |
| 3                | 8                | 0.207793                | 1.713855  | 0.107810  |
| 4                | 8                | -2.196819               | -0.149619 | 0.455128  |
| 5                | 8                | 0.071194                | -0.120452 | 2.160109  |
| 6                | 8                | -0.165845               | -2.435877 | 1.097975  |
| 7                | 8                | -0.021928               | -3.547786 | 3.045537  |
| 8                | 7                | 1.787911                | 0.290984  | -2.036917 |
| 9                | 7                | -1.164454               | 0.801528  | -2.118331 |
| 10               | 7                | -1.733187               | -2.060582 | -1.452353 |
| 11               | 7                | 1.137038                | -2.506722 | -1.481515 |
| 12               | 7                | 4.449217                | -0.026045 | 0.410251  |
| 13               | 1                | 5.229696                | 0.453354  | -0.052058 |
| 14               | 7                | -0.361853               | 3.864017  | -0.320979 |
| 15               | 1                | -0.904481               | 4.563394  | -0.842087 |
| 16               | 7                | -4.376376               | -0.732678 | 0.663527  |
| 17               | 1                | -5.158411               | -1.365760 | 0.463423  |
| 18               | 6                | 1.173338                | 1.355503  | -2.876443 |
| 19               | 1                | 1.193341                | 2.287568  | -2.310168 |
| 20               | 1                | 1.763894                | 1.525623  | -3.786081 |
| 21               | 6                | -0.253697               | 1.010198  | -3.280434 |
| 22               | 1                | -0.262482               | 0.094703  | -3.873954 |
| 23               | 1                | -0.644118               | 1.809653  | -3.924280 |
| 24               | 6                | -2.393004               | 0.092964  | -2.583668 |
| 25               | 1                | -3.193310               | 0.301573  | -1.874129 |
| 26               | 1                | -2.720050               | 0.486066  | -3.554829 |
| 27               | 6                | -2.173457               | -1.410268 | -2.717346 |
| 28               | 1                | -1.410790               | -1.606708 | -3.471487 |
| 29               | 1                | -3.102377               | -1.872562 | -3.077315 |
| 30               | 6                | -1.142427               | -3.400679 | -1.741691 |
| 31               | 1                | -1.056341               | -3.917302 | -0.784529 |
| 32               | 1                | -1.802611               | -3.984724 | -2.395508 |
| 33               | 6                | 0.239958                | -3.288323 | -2.364368 |
| 34               | 1                | 0.202067                | -2.793525 | -3.337565 |
| 35               | 1                | 0.635154                | -4.296121 | -2.537534 |
| 36               | 6                | 2.408568                | -2.142856 | -2.148840 |
| 37               | 1                | 3.185076                | -2.066288 | -1.388234 |
| 38               | 1                | 2.725012                | -2.921022 | -2.853431 |
| 39               | 6                | 2.245318                | -0.830571 | -2.908080 |

## Supporting information

|    |   |           |           |           |
|----|---|-----------|-----------|-----------|
| 40 | 1 | 1.500175  | -0.962522 | -3.694782 |
| 41 | 1 | 3.188904  | -0.563517 | -3.401877 |
| 42 | 6 | 2.926527  | 0.848290  | -1.273812 |
| 43 | 1 | 3.820916  | 0.965628  | -1.897617 |
| 44 | 1 | 2.636757  | 1.834775  | -0.903359 |
| 45 | 6 | 3.212230  | 0.002654  | -0.045725 |
| 46 | 6 | 4.912721  | -0.700553 | 1.616222  |
| 47 | 1 | 4.391730  | -0.317660 | 2.498179  |
| 48 | 6 | -1.534328 | 2.099492  | -1.508243 |
| 49 | 1 | -1.736167 | 2.865093  | -2.266807 |
| 50 | 1 | -2.444307 | 1.948318  | -0.923388 |
| 51 | 6 | -0.480563 | 2.567259  | -0.519183 |
| 52 | 6 | 0.504932  | 4.526090  | 0.646200  |
| 53 | 1 | 0.265297  | 4.204640  | 1.663423  |
| 54 | 6 | -2.871478 | -2.232585 | -0.521456 |
| 55 | 1 | -3.767600 | -2.600709 | -1.035462 |
| 56 | 1 | -2.574397 | -2.968865 | 0.229659  |
| 57 | 6 | -3.147397 | -0.945703 | 0.233144  |
| 58 | 6 | -4.827390 | 0.384828  | 1.483174  |
| 59 | 1 | -4.294471 | 0.403669  | 2.438052  |
| 60 | 6 | 0.023337  | -2.515630 | 2.376024  |
| 61 | 6 | 0.371132  | -1.193158 | 3.085434  |
| 62 | 1 | 0.537368  | 0.686961  | 2.416083  |
| 63 | 1 | 1.344106  | -3.080703 | -0.664640 |
| 64 | 6 | -6.355170 | 0.208239  | 1.732693  |
| 65 | 8 | -6.891021 | 1.103817  | 2.419080  |
| 66 | 8 | -6.879072 | -0.817379 | 1.215415  |
| 67 | 6 | 0.281381  | 6.062347  | 0.505524  |
| 68 | 8 | -0.560879 | 6.412819  | -0.367455 |
| 69 | 8 | 0.962275  | 6.774333  | 1.272476  |
| 70 | 6 | 6.443373  | -0.441888 | 1.749677  |
| 71 | 8 | 6.959472  | 0.265980  | 0.840581  |
| 72 | 8 | 6.988874  | -0.965406 | 2.743895  |
| 73 | 6 | -0.378018 | -1.007032 | 4.397807  |
| 74 | 1 | -0.061842 | -0.087429 | 4.897236  |
| 75 | 1 | -1.455527 | -0.960284 | 4.219445  |
| 76 | 1 | -0.166728 | -1.853929 | 5.052877  |
| 77 | 1 | 1.452840  | -1.205819 | 3.259783  |
| 78 | 1 | -4.643259 | 1.336042  | 0.976440  |
| 79 | 1 | 1.554045  | 4.285972  | 0.453725  |
| 80 | 1 | 4.722302  | -1.775545 | 1.553441  |

-----  
E(RTPSSh) = -2225.2975105 Hartree

Zero-point correction = 0.641500

Thermal correction to Energy = 0.685764

Thermal correction to Enthalpy = 0.686708

Thermal correction to Gibbs Free Energy = 0.560812

Sum of electronic and zero-point Energies = -2224.656010

Sum of electronic and thermal Energies = -2224.611746

Sum of electronic and thermal Enthalpies = -2224.610802

Sum of electronic and thermal Free Energies = -2224.736698

## Supporting information

$\Delta(\lambda\lambda\lambda\lambda)$ , D-lactate•Yb<sub>0</sub>, 0 imaginary frequencies

| Center<br>Number | Atomic<br>Number | Coordinates (Angstroms) |           |           |
|------------------|------------------|-------------------------|-----------|-----------|
|                  |                  | X                       | Y         | Z         |
| 1                | 70               | 0.050999                | -0.597326 | -0.207319 |
| 2                | 8                | 2.282463                | -0.653283 | 0.521259  |
| 3                | 8                | 0.220783                | 1.710183  | 0.138279  |
| 4                | 8                | -2.175459               | -0.142724 | 0.461553  |
| 5                | 8                | 0.036357                | -0.128578 | 2.169487  |
| 6                | 8                | -0.208507               | -2.439047 | 1.093406  |
| 7                | 8                | -0.634740               | -3.500527 | 3.027679  |
| 8                | 7                | 1.826191                | 0.284261  | -2.013301 |
| 9                | 7                | -1.120517               | 0.824269  | -2.117329 |
| 10               | 7                | -1.724074               | -2.033266 | -1.477260 |
| 11               | 7                | 1.141929                | -2.515505 | -1.478884 |
| 12               | 7                | 4.472928                | -0.085355 | 0.441400  |
| 13               | 1                | 5.260338                | 0.392697  | -0.010171 |
| 14               | 7                | -0.300622               | 3.869484  | -0.306269 |
| 15               | 1                | -0.819728               | 4.577450  | -0.839760 |
| 16               | 7                | -4.371392               | -0.677997 | 0.617695  |
| 17               | 1                | -5.164599               | -1.289153 | 0.393519  |
| 18               | 6                | 1.229565                | 1.361981  | -2.848578 |
| 19               | 1                | 1.252691                | 2.288303  | -2.273014 |
| 20               | 1                | 1.830335                | 1.535129  | -3.750921 |
| 21               | 6                | -0.196458               | 1.033502  | -3.268977 |
| 22               | 1                | -0.207380               | 0.122775  | -3.869648 |
| 23               | 1                | -0.573294               | 1.841429  | -3.910283 |
| 24               | 6                | -2.349725               | 0.130000  | -2.600816 |
| 25               | 1                | -3.155032               | 0.337355  | -1.896140 |
| 26               | 1                | -2.665398               | 0.535106  | -3.570748 |
| 27               | 6                | -2.138442               | -1.372734 | -2.745265 |
| 28               | 1                | -1.364776               | -1.568035 | -3.488417 |
| 29               | 1                | -3.064302               | -1.826098 | -3.124017 |
| 30               | 6                | -1.147372               | -3.380058 | -1.762953 |
| 31               | 1                | -1.077525               | -3.899487 | -0.805989 |
| 32               | 1                | -1.807745               | -3.954496 | -2.425138 |
| 33               | 6                | 0.242003                | -3.282738 | -2.371916 |
| 34               | 1                | 0.218581                | -2.783176 | -3.343071 |
| 35               | 1                | 0.626482                | -4.294407 | -2.545984 |
| 36               | 6                | 2.419083                | -2.158378 | -2.140851 |
| 37               | 1                | 3.195312                | -2.098619 | -1.378718 |
| 38               | 1                | 2.727132                | -2.933449 | -2.852482 |
| 39               | 6                | 2.273588                | -0.837524 | -2.889698 |
| 40               | 1                | 1.530284                | -0.955057 | -3.680405 |
| 41               | 1                | 3.222315                | -0.578529 | -3.377887 |
| 42               | 6                | 2.967455                | 0.822871  | -1.240911 |
| 43               | 1                | 3.864948                | 0.938930  | -1.860552 |
| 44               | 1                | 2.685730                | 1.807941  | -0.860366 |
| 45               | 6                | 3.239317                | -0.042063 | -0.023160 |
| 46               | 6                | 4.923847                | -0.783219 | 1.638849  |

## Supporting information

|    |   |           |           |           |
|----|---|-----------|-----------|-----------|
| 47 | 1 | 4.409403  | -0.402245 | 2.525527  |
| 48 | 6 | -1.486962 | 2.122243  | -1.505544 |
| 49 | 1 | -1.674186 | 2.892800  | -2.262826 |
| 50 | 1 | -2.404862 | 1.976582  | -0.931627 |
| 51 | 6 | -0.440848 | 2.574805  | -0.502619 |
| 52 | 6 | 0.565046  | 4.518493  | 0.670780  |
| 53 | 1 | 0.301041  | 4.210167  | 1.686022  |
| 54 | 6 | -2.880390 | -2.192348 | -0.566731 |
| 55 | 1 | -3.776922 | -2.529548 | -1.100813 |
| 56 | 1 | -2.616752 | -2.950343 | 0.175081  |
| 57 | 6 | -3.140477 | -0.912593 | 0.205988  |
| 58 | 6 | -4.810748 | 0.434646  | 1.450326  |
| 59 | 1 | -4.291891 | 0.425186  | 2.413057  |
| 60 | 6 | -0.433146 | -2.481108 | 2.367607  |
| 61 | 6 | -0.484195 | -1.119395 | 3.086775  |
| 62 | 1 | -0.266874 | 0.755456  | 2.416666  |
| 63 | 1 | 1.344073  | -3.099542 | -0.667764 |
| 64 | 6 | 0.292292  | -1.110336 | 4.396670  |
| 65 | 1 | 0.181181  | -0.148796 | 4.904770  |
| 66 | 1 | 1.354187  | -1.291891 | 4.211636  |
| 67 | 1 | -0.091668 | -1.898885 | 5.046087  |
| 68 | 1 | -1.542385 | -0.900256 | 3.269870  |
| 69 | 6 | -6.345536 | 0.286521  | 1.673870  |
| 70 | 8 | -6.871753 | 1.179242  | 2.371166  |
| 71 | 8 | -6.883486 | -0.716224 | 1.127108  |
| 72 | 6 | 0.379585  | 6.058358  | 0.515326  |
| 73 | 8 | -0.438674 | 6.421583  | -0.375140 |
| 74 | 8 | 1.063001  | 6.760144  | 1.289305  |
| 75 | 6 | 6.458584  | -0.552379 | 1.776476  |
| 76 | 8 | 6.986251  | 0.163576  | 0.880347  |
| 77 | 8 | 6.995864  | -1.102321 | 2.760938  |
| 78 | 1 | 1.611262  | 4.252372  | 0.497835  |
| 79 | 1 | -4.598651 | 1.390215  | 0.963108  |
| 80 | 1 | 4.714484  | -1.853744 | 1.562544  |

-----  
E (RTPSSh) = -2225.2975108 Hartree  
Zero-point correction = 0.641595  
Thermal correction to Energy = 0.685796  
Thermal correction to Enthalpy = 0.686740  
Thermal correction to Gibbs Free Energy = 0.561253  
Sum of electronic and zero-point Energies = -2224.655916  
Sum of electronic and thermal Energies = -2224.611715  
Sum of electronic and thermal Enthalpies = -2224.610771  
Sum of electronic and thermal Free Energies = -2224.736258

$\Lambda(\delta\delta\delta\delta)$ , D-lactate•Yb<sub>3</sub>, 0 imaginary frequencies

-----  

| Center<br>Number | Atomic<br>Number | Coordinates (Angstroms) |   |   |
|------------------|------------------|-------------------------|---|---|
|                  |                  | X                       | Y | Z |

  
-----

## Supporting information

|    |    |           |           |           |
|----|----|-----------|-----------|-----------|
| 1  | 70 | 0.055355  | -0.702379 | -0.304536 |
| 2  | 8  | 2.275003  | -0.573219 | 0.469889  |
| 3  | 8  | 0.185582  | 1.631037  | -0.252441 |
| 4  | 8  | -2.193837 | -0.216434 | 0.265284  |
| 5  | 8  | 0.032126  | 0.052046  | 1.999677  |
| 6  | 8  | -0.127134 | -2.376974 | 1.220031  |
| 7  | 8  | 0.043388  | -3.249705 | 3.283752  |
| 8  | 7  | 1.840499  | -0.009982 | -2.177852 |
| 9  | 7  | -1.117796 | 0.434024  | -2.380832 |
| 10 | 7  | -1.647279 | -2.342596 | -1.371882 |
| 11 | 7  | 1.229894  | -2.728306 | -1.293333 |
| 12 | 7  | 4.447322  | 0.071528  | 0.354470  |
| 13 | 1  | 5.195680  | 0.602082  | -0.108370 |
| 14 | 7  | -0.530837 | 3.703669  | -0.838484 |
| 15 | 1  | -1.189730 | 4.305649  | -1.351023 |
| 16 | 7  | -4.339897 | -0.880968 | 0.615018  |
| 17 | 1  | -5.050900 | -1.623399 | 0.595498  |
| 18 | 6  | 1.224553  | 0.933425  | -3.152015 |
| 19 | 1  | 1.211808  | 1.925663  | -2.698659 |
| 20 | 1  | 1.833854  | 1.008565  | -4.062147 |
| 21 | 6  | -0.185556 | 0.511614  | -3.541513 |
| 22 | 1  | -0.164908 | -0.470699 | -4.016299 |
| 23 | 1  | -0.574774 | 1.217048  | -4.287729 |
| 24 | 6  | -2.323845 | -0.354821 | -2.772450 |
| 25 | 1  | -3.138525 | -0.079151 | -2.103863 |
| 26 | 1  | -2.642300 | -0.092075 | -3.789273 |
| 27 | 6  | -2.074334 | -1.858161 | -2.715770 |
| 28 | 1  | -1.295531 | -2.129577 | -3.429265 |
| 29 | 1  | -2.987845 | -2.379629 | -3.030690 |
| 30 | 6  | -1.026569 | -3.695956 | -1.487213 |
| 31 | 1  | -0.953325 | -4.093467 | -0.473829 |
| 32 | 1  | -1.661794 | -4.366594 | -2.079732 |
| 33 | 6  | 0.367950  | -3.632199 | -2.090146 |
| 34 | 1  | 0.343347  | -3.262799 | -3.117848 |
| 35 | 1  | 0.785675  | -4.645010 | -2.128267 |
| 36 | 6  | 2.508675  | -2.424106 | -1.977065 |
| 37 | 1  | 3.267567  | -2.235884 | -1.218227 |
| 38 | 1  | 2.854023  | -3.277420 | -2.572799 |
| 39 | 6  | 2.331861  | -1.221116 | -2.896918 |
| 40 | 1  | 1.598393  | -1.466528 | -3.667200 |
| 41 | 1  | 3.276148  | -0.997733 | -3.410318 |
| 42 | 6  | 2.953173  | 0.659675  | -1.471989 |
| 43 | 1  | 3.859137  | 0.710667  | -2.088151 |
| 44 | 1  | 2.639931  | 1.680995  | -1.241464 |
| 45 | 6  | 3.224708  | -0.009228 | -0.135753 |
| 46 | 6  | 4.883778  | -0.337822 | 1.691976  |
| 47 | 1  | 4.166055  | 0.038669  | 2.427371  |
| 48 | 6  | -1.523566 | 1.789732  | -1.947167 |
| 49 | 1  | -1.681661 | 2.459701  | -2.800631 |
| 50 | 1  | -2.467914 | 1.699645  | -1.405922 |
| 51 | 6  | -0.538439 | 2.390327  | -0.955396 |
| 52 | 6  | 0.143838  | 4.495655  | 0.194157  |

## Supporting information

|    |   |           |           |           |
|----|---|-----------|-----------|-----------|
| 53 | 1 | -0.028424 | 4.024971  | 1.167020  |
| 54 | 6 | -2.799526 | -2.425695 | -0.447162 |
| 55 | 1 | -3.681422 | -2.861702 | -0.931650 |
| 56 | 1 | -2.507071 | -3.070871 | 0.385331  |
| 57 | 6 | -3.112224 | -1.072491 | 0.166417  |
| 58 | 6 | -4.814458 | 0.226078  | 1.449914  |
| 59 | 1 | -4.094236 | 0.391369  | 2.257572  |
| 60 | 6 | 0.051879  | -2.300583 | 2.499344  |
| 61 | 6 | 0.332206  | -0.891989 | 3.055055  |
| 62 | 1 | 0.467442  | 0.898487  | 2.169060  |
| 63 | 1 | 1.427611  | -3.191084 | -0.406447 |
| 64 | 6 | -5.006020 | 1.527233  | 0.666191  |
| 65 | 6 | 1.649783  | 4.628694  | -0.047597 |
| 66 | 6 | 5.002236  | -1.858939 | 1.828939  |
| 67 | 1 | -5.460358 | 2.264645  | 1.330092  |
| 68 | 1 | -4.052776 | 1.917685  | 0.303231  |
| 69 | 1 | -5.671956 | 1.365650  | -0.186711 |
| 70 | 6 | -6.163807 | -0.253444 | 2.084304  |
| 71 | 8 | -6.698614 | 0.549546  | 2.878609  |
| 72 | 8 | -6.573746 | -1.391806 | 1.719930  |
| 73 | 1 | 1.842724  | 5.044558  | -1.040917 |
| 74 | 1 | 2.059887  | 5.308371  | 0.701377  |
| 75 | 1 | 2.153360  | 3.662999  | 0.036460  |
| 76 | 6 | -0.555981 | 5.897033  | 0.190578  |
| 77 | 8 | -1.442292 | 6.069001  | -0.693632 |
| 78 | 8 | -0.152742 | 6.700710  | 1.057697  |
| 79 | 1 | 4.031661  | -2.344841 | 1.705139  |
| 80 | 1 | 5.695039  | -2.255353 | 1.080507  |
| 81 | 1 | 5.393282  | -2.088030 | 2.821790  |
| 82 | 6 | 6.261611  | 0.361821  | 1.937852  |
| 83 | 8 | 6.730574  | 1.016997  | 0.964410  |
| 84 | 8 | 6.758721  | 0.185801  | 3.071092  |
| 85 | 6 | -0.470096 | -0.579344 | 4.311083  |
| 86 | 1 | -0.200234 | 0.403005  | 4.707518  |
| 87 | 1 | -1.541218 | -0.590329 | 4.092880  |
| 88 | 1 | -0.257503 | -1.335747 | 5.068542  |
| 89 | 1 | 1.406374  | -0.845939 | 3.265525  |

-----  
E(RTPSSh) = -2343.2838577  
Zero-point correction = 0.724926  
Thermal correction to Energy = 0.773606  
Thermal correction to Enthalpy = 0.774551  
Thermal correction to Gibbs Free Energy = 0.639431  
Sum of electronic and zero-point Energies = -2342.558932  
Sum of electronic and thermal Energies = -2342.510251  
Sum of electronic and thermal Enthalpies = -2342.509307  
Sum of electronic and thermal Free Energies = -2342.644426

$\Delta(\lambda\lambda\lambda\lambda)$ , D-lactate•Yb<sub>3</sub>, 0 imaginary frequencies



## Supporting information

| Center<br>Number | Atomic<br>Number | Coordinates (Angstroms) |           |           |
|------------------|------------------|-------------------------|-----------|-----------|
|                  |                  | X                       | Y         | Z         |
| 1                | 70               | -0.049411               | -0.688915 | -0.290027 |
| 2                | 8                | -2.270819               | -0.574785 | 0.416363  |
| 3                | 8                | -0.134771               | 1.634469  | -0.036456 |
| 4                | 8                | 2.156760                | -0.313408 | 0.521659  |
| 5                | 8                | -0.015788               | -0.211218 | 2.144791  |
| 6                | 8                | 0.044012                | -2.567200 | 1.002175  |
| 7                | 8                | -0.259765               | -3.707383 | 2.916062  |
| 8                | 7                | -1.711005               | 0.212210  | -2.169238 |
| 9                | 7                | 1.273438                | 0.623210  | -2.172158 |
| 10               | 7                | 1.705117                | -2.227795 | -1.425167 |
| 11               | 7                | -1.178707               | -2.582777 | -1.547832 |
| 12               | 7                | -4.425514               | 0.119925  | 0.244927  |
| 13               | 1                | -5.184902               | 0.527937  | -0.314113 |
| 14               | 7                | 0.535533                | 3.758084  | -0.470111 |
| 15               | 1                | 1.056601                | 4.426752  | -1.051157 |
| 16               | 7                | 4.337614                | -0.933096 | 0.701919  |
| 17               | 1                | 5.116154                | -1.532002 | 0.395426  |
| 18               | 6                | -1.025355               | 1.228324  | -3.017182 |
| 19               | 1                | -1.027842               | 2.177134  | -2.479252 |
| 20               | 1                | -1.579320               | 1.393264  | -3.950210 |
| 21               | 6                | 0.399917                | 0.817863  | -3.365899 |
| 22               | 1                | 0.392394                | -0.120575 | -3.922901 |
| 23               | 1                | 0.835348                | 1.577440  | -4.028707 |
| 24               | 6                | 2.494004                | -0.133604 | -2.577283 |
| 25               | 1                | 3.273483                | 0.065375  | -1.841563 |
| 26               | 1                | 2.871286                | 0.227880  | -3.542471 |
| 27               | 6                | 2.230198                | -1.630420 | -2.684780 |
| 28               | 1                | 1.498470                | -1.821478 | -3.470337 |
| 29               | 1                | 3.158093                | -2.135023 | -2.984293 |
| 30               | 6                | 1.077744                | -3.552341 | -1.716783 |
| 31               | 1                | 0.937984                | -4.050451 | -0.756829 |
| 32               | 1                | 1.740871                | -4.166385 | -2.338970 |
| 33               | 6                | -0.277608               | -3.401629 | -2.391599 |
| 34               | 1                | -0.189692               | -2.920519 | -3.368402 |
| 35               | 1                | -0.698698               | -4.398469 | -2.567422 |
| 36               | 6                | -2.424600               | -2.193644 | -2.246392 |
| 37               | 1                | -3.209093               | -2.069824 | -1.499730 |
| 38               | 1                | -2.757768               | -2.976746 | -2.937616 |
| 39               | 6                | -2.198192               | -0.905844 | -3.029299 |
| 40               | 1                | -1.443835               | -1.082746 | -3.798276 |
| 41               | 1                | -3.120395               | -0.609906 | -3.545760 |
| 42               | 6                | -2.838312               | 0.838492  | -1.444232 |
| 43               | 1                | -3.717437               | 0.969035  | -2.086638 |
| 44               | 1                | -2.515965               | 1.825498  | -1.103805 |
| 45               | 6                | -3.181587               | 0.056342  | -0.187380 |
| 46               | 6                | -4.977966               | -0.516077 | 1.442747  |
| 47               | 1                | -4.635847               | -1.554555 | 1.480315  |
| 48               | 6                | -4.564578               | 0.208530  | 2.727696  |

## Supporting information

|    |   |           |           |           |
|----|---|-----------|-----------|-----------|
| 49 | 1 | -3.481245 | 0.183366  | 2.866035  |
| 50 | 1 | -5.046142 | -0.282488 | 3.575108  |
| 51 | 1 | -4.890376 | 1.252549  | 2.696639  |
| 52 | 6 | 1.668034  | 1.929249  | -1.596967 |
| 53 | 1 | 1.907362  | 2.663460  | -2.375511 |
| 54 | 1 | 2.563224  | 1.774869  | -0.990260 |
| 55 | 6 | 0.604742  | 2.453572  | -0.647726 |
| 56 | 6 | -0.387399 | 4.480611  | 0.408795  |
| 57 | 1 | -1.400381 | 4.100083  | 0.246177  |
| 58 | 6 | -0.019543 | 4.336099  | 1.888819  |
| 59 | 1 | -0.091608 | 3.296267  | 2.215757  |
| 60 | 1 | -0.707370 | 4.944996  | 2.477961  |
| 61 | 1 | 1.000159  | 4.692328  | 2.063325  |
| 62 | 6 | 2.793469  | -2.419833 | -0.439597 |
| 63 | 1 | 3.692883  | -2.842036 | -0.903441 |
| 64 | 1 | 2.429038  | -3.118485 | 0.318161  |
| 65 | 6 | 3.099873  | -1.127665 | 0.295468  |
| 66 | 6 | 4.874073  | 0.234348  | 1.406671  |
| 67 | 1 | 4.480968  | 1.141133  | 0.938115  |
| 68 | 6 | 4.525901  | 0.236469  | 2.897878  |
| 69 | 1 | 3.449654  | 0.332144  | 3.057621  |
| 70 | 1 | 5.029146  | 1.082599  | 3.368809  |
| 71 | 1 | 4.872619  | -0.686054 | 3.372467  |
| 72 | 6 | -0.181297 | -2.659576 | 2.273832  |
| 73 | 6 | -0.413554 | -1.316214 | 2.996426  |
| 74 | 1 | 0.939401  | -0.069894 | 2.250938  |
| 75 | 1 | -1.415427 | -3.135227 | -0.724224 |
| 76 | 6 | 6.424575  | 0.193970  | 1.189503  |
| 77 | 8 | 7.056429  | 1.168779  | 1.648277  |
| 78 | 8 | 6.869636  | -0.824731 | 0.588346  |
| 79 | 6 | -0.340823 | 5.977108  | -0.046965 |
| 80 | 8 | -1.132039 | 6.743428  | 0.543238  |
| 81 | 8 | 0.498525  | 6.253081  | -0.950646 |
| 82 | 6 | -6.532601 | -0.506221 | 1.266222  |
| 83 | 8 | -7.179155 | -1.085117 | 2.165362  |
| 84 | 8 | -6.968320 | 0.099577  | 0.246215  |
| 85 | 6 | 0.253545  | -1.240364 | 4.361276  |
| 86 | 1 | 1.342225  | -1.311407 | 4.268514  |
| 87 | 1 | -0.000482 | -0.304019 | 4.863156  |
| 88 | 1 | -0.088397 | -2.078044 | 4.970417  |
| 89 | 1 | -1.495330 | -1.201260 | 3.099897  |

-----  
E(RTPSSh) = -2343.2848806 Hartree

Zero-point correction = 0.726201

Thermal correction to Energy = 0.774341

Thermal correction to Enthalpy = 0.775285

Thermal correction to Gibbs Free Energy = 0.643051

Sum of electronic and zero-point Energies = -2342.558680

Sum of electronic and thermal Energies = -2342.510540

Sum of electronic and thermal Enthalpies = -2342.509596

Sum of electronic and thermal Free Energies = -2342.641830

## Supporting information

$\Lambda(\lambda\lambda\lambda\lambda)$ , D-lactate•Yb<sub>3</sub>, 0 imaginary frequencies

| Center<br>Number | Atomic<br>Number | Coordinates (Angstroms) |           |           |
|------------------|------------------|-------------------------|-----------|-----------|
|                  |                  | X                       | Y         | Z         |
| 1                | 70               | 0.078435                | -0.866349 | -0.208714 |
| 2                | 8                | -2.073134               | 0.007343  | 0.200994  |
| 3                | 8                | 0.443509                | 1.379594  | -0.805081 |
| 4                | 8                | 2.251759                | -0.506780 | 0.687448  |
| 5                | 8                | 0.167015                | 0.521522  | 1.894546  |
| 6                | 8                | -0.388156               | -2.022747 | 1.691742  |
| 7                | 8                | -1.015876               | -2.253244 | 3.836669  |
| 8                | 7                | -1.933101               | -2.294811 | -1.142992 |
| 9                | 7                | -0.526385               | -0.208702 | -2.701509 |
| 10               | 7                | 2.116441                | -1.287811 | -1.871561 |
| 11               | 7                | 0.702670                | -3.330552 | -0.414393 |
| 12               | 7                | -4.232153               | -0.340575 | 0.813386  |
| 13               | 1                | -5.023684               | -0.978242 | 0.970968  |
| 14               | 7                | -0.409775               | 3.273792  | -1.719306 |
| 15               | 1                | -1.085997               | 3.737779  | -2.339281 |
| 16               | 7                | 4.393462                | 0.218552  | 0.483062  |
| 17               | 1                | 5.178867                | 0.538934  | -0.099875 |
| 18               | 6                | -2.511095               | -1.687688 | -2.377203 |
| 19               | 1                | -3.151772               | -0.857080 | -2.074724 |
| 20               | 1                | -3.155269               | -2.410875 | -2.892400 |
| 21               | 6                | -1.443472               | -1.189676 | -3.338519 |
| 22               | 1                | -0.836791               | -2.024365 | -3.693704 |
| 23               | 1                | -1.928554               | -0.751428 | -4.220562 |
| 24               | 6                | 0.709327                | -0.059579 | -3.525771 |
| 25               | 1                | 1.166317                | 0.898921  | -3.273429 |
| 26               | 1                | 0.449830                | -0.016574 | -4.591162 |
| 27               | 6                | 1.704503                | -1.185438 | -3.295296 |
| 28               | 1                | 1.261477                | -2.141154 | -3.579146 |
| 29               | 1                | 2.577528                | -1.034019 | -3.943306 |
| 30               | 6                | 2.720317                | -2.627936 | -1.611436 |
| 31               | 1                | 3.282175                | -2.562660 | -0.676383 |
| 32               | 1                | 3.431956                | -2.886786 | -2.405576 |
| 33               | 6                | 1.660034                | -3.708276 | -1.475061 |
| 34               | 1                | 1.110289                | -3.837927 | -2.409480 |
| 35               | 1                | 2.145343                | -4.666260 | -1.255678 |
| 36               | 6                | -0.507706               | -4.190399 | -0.381886 |
| 37               | 1                | -0.907198               | -4.130019 | 0.630400  |
| 38               | 1                | -0.256942               | -5.236962 | -0.590930 |
| 39               | 6                | -1.536281               | -3.706787 | -1.395494 |
| 40               | 1                | -1.118365               | -3.753185 | -2.403505 |
| 41               | 1                | -2.415285               | -4.363657 | -1.382964 |
| 42               | 6                | -2.943384               | -2.211881 | -0.067146 |
| 43               | 1                | -2.579548               | -2.765557 | 0.801881  |
| 44               | 1                | -3.908379               | -2.631439 | -0.377031 |
| 45               | 6                | -3.075770               | -0.751143 | 0.335330  |
| 46               | 6                | -4.540798               | 0.973537  | 1.384786  |

## Supporting information

|    |   |           |           |           |
|----|---|-----------|-----------|-----------|
| 47 | 1 | -3.764399 | 1.236155  | 2.109727  |
| 48 | 6 | -4.636826 | 2.073863  | 0.322933  |
| 49 | 1 | -3.673272 | 2.247045  | -0.161134 |
| 50 | 1 | -4.960051 | 2.994642  | 0.811682  |
| 51 | 1 | -5.374483 | 1.805071  | -0.439092 |
| 52 | 6 | -1.159551 | 1.120399  | -2.575471 |
| 53 | 1 | -2.146340 | 1.011243  | -2.120462 |
| 54 | 1 | -1.280927 | 1.611401  | -3.548929 |
| 55 | 6 | -0.309969 | 1.963287  | -1.633640 |
| 56 | 6 | 0.191361  | 4.259667  | -0.816407 |
| 57 | 1 | 0.029455  | 3.934857  | 0.215711  |
| 58 | 6 | 1.691903  | 4.441266  | -1.064164 |
| 59 | 1 | 2.242410  | 3.521557  | -0.853379 |
| 60 | 1 | 2.056714  | 5.234983  | -0.409987 |
| 61 | 1 | 1.874469  | 4.733386  | -2.102711 |
| 62 | 6 | 3.112202  | -0.250331 | -1.534666 |
| 63 | 1 | 2.742983  | 0.722883  | -1.867368 |
| 64 | 1 | 4.079865  | -0.437367 | -2.015902 |
| 65 | 6 | 3.249553  | -0.185070 | -0.023449 |
| 66 | 6 | 4.697721  | 0.468314  | 1.895199  |
| 67 | 1 | 3.906979  | 1.092397  | 2.322804  |
| 68 | 6 | 4.823149  | -0.826820 | 2.703474  |
| 69 | 1 | 3.877447  | -1.372612 | 2.728858  |
| 70 | 1 | 5.116710  | -0.569785 | 3.722516  |
| 71 | 1 | 5.593018  | -1.472270 | 2.270239  |
| 72 | 6 | -0.637351 | -1.574264 | 2.882160  |
| 73 | 6 | -0.468965 | -0.051750 | 3.058346  |
| 74 | 1 | 1.131883  | 0.449096  | 2.002607  |
| 75 | 1 | 1.162328  | -3.436487 | 0.489794  |
| 76 | 6 | 6.035057  | 1.281933  | 1.913063  |
| 77 | 8 | 6.428140  | 1.644214  | 3.042081  |
| 78 | 8 | 6.578528  | 1.472676  | 0.788192  |
| 79 | 6 | -0.590433 | 5.595703  | -1.045613 |
| 80 | 8 | -0.248584 | 6.550294  | -0.315240 |
| 81 | 8 | -1.473099 | 5.571276  | -1.949932 |
| 82 | 6 | -5.896099 | 0.805169  | 2.150537  |
| 83 | 8 | -6.289638 | 1.813711  | 2.774171  |
| 84 | 8 | -6.452686 | -0.324670 | 2.046180  |
| 85 | 6 | 0.263611  | 0.320760  | 4.340200  |
| 86 | 1 | 1.290109  | -0.060501 | 4.325445  |
| 87 | 1 | 0.289980  | 1.405406  | 4.466452  |
| 88 | 1 | -0.253144 | -0.126755 | 5.190293  |
| 89 | 1 | -1.474737 | 0.376750  | 3.068856  |

-----  
E(RTPSSh) = -2343.2824274 Hartree

Zero-point correction = 0.725412

Thermal correction to Energy = 0.773786

Thermal correction to Enthalpy = 0.774731

Thermal correction to Gibbs Free Energy = 0.640668

Sum of electronic and zero-point Energies = -2342.557015

Sum of electronic and thermal Energies = -2342.508641

Sum of electronic and thermal Enthalpies = -2342.507697

## Supporting information

Sum of electronic and thermal Free Energies = -2342.641759

$\Delta(\delta\delta\delta\delta)$ , D-lactate•Yb<sub>3</sub>, 0 imaginary frequencies

| Center<br>Number | Atomic<br>Number | Coordinates (Angstroms) |           |           |
|------------------|------------------|-------------------------|-----------|-----------|
|                  |                  | X                       | Y         | Z         |
| 1                | 70               | -0.073687               | -0.849155 | -0.204323 |
| 2                | 8                | 2.078310                | -0.054557 | 0.370470  |
| 3                | 8                | -0.346756               | 1.435438  | -0.677568 |
| 4                | 8                | -2.291431               | -0.437740 | 0.577764  |
| 5                | 8                | -0.266004               | 0.401048  | 1.991998  |
| 6                | 8                | 0.228017                | -2.137451 | 1.642106  |
| 7                | 8                | 0.685749                | -2.546721 | 3.803370  |
| 8                | 7                | 1.942384                | -2.277835 | -1.103613 |
| 9                | 7                | 0.689718                | -0.061394 | -2.608239 |
| 10               | 7                | -2.021003               | -1.108222 | -2.009760 |
| 11               | 7                | -0.749786               | -3.274485 | -0.599989 |
| 12               | 7                | 4.226426                | -0.485580 | 0.979201  |
| 13               | 1                | 5.047427                | -1.104456 | 0.943460  |
| 14               | 7                | 0.568757                | 3.361095  | -1.453830 |
| 15               | 1                | 1.131304                | 3.861162  | -2.153414 |
| 16               | 7                | -4.405359               | 0.339050  | 0.274244  |
| 17               | 1                | -5.213260               | 0.484459  | -0.344898 |
| 18               | 6                | 2.613008                | -1.615580 | -2.260792 |
| 19               | 1                | 3.256737                | -0.823888 | -1.872104 |
| 20               | 1                | 3.266787                | -2.326798 | -2.780179 |
| 21               | 6                | 1.617638                | -1.030217 | -3.249282 |
| 22               | 1                | 1.012515                | -1.826431 | -3.685293 |
| 23               | 1                | 2.163995                | -0.556116 | -4.074934 |
| 24               | 6                | -0.485959               | 0.172947  | -3.498376 |
| 25               | 1                | -0.932142               | 1.128978  | -3.217906 |
| 26               | 1                | -0.157170               | 0.270531  | -4.540844 |
| 27               | 6                | -1.523409               | -0.933018 | -3.398359 |
| 28               | 1                | -1.095762               | -1.883098 | -3.721496 |
| 29               | 1                | -2.352994               | -0.712191 | -4.082658 |
| 30               | 6                | -2.672913               | -2.443396 | -1.867213 |
| 31               | 1                | -3.286350               | -2.418302 | -0.962881 |
| 32               | 1                | -3.343443               | -2.633196 | -2.714865 |
| 33               | 6                | -1.648571               | -3.558511 | -1.738138 |
| 34               | 1                | -1.043615               | -3.642885 | -2.642842 |
| 35               | 1                | -2.167962               | -4.515283 | -1.610758 |
| 36               | 6                | 0.430123                | -4.174626 | -0.548369 |
| 37               | 1                | 0.766865                | -4.191552 | 0.488003  |
| 38               | 1                | 0.162174                | -5.197167 | -0.839092 |
| 39               | 6                | 1.531809                | -3.661715 | -1.465330 |
| 40               | 1                | 1.177548                | -3.639121 | -2.498470 |
| 41               | 1                | 2.393768                | -4.340197 | -1.436674 |
| 42               | 6                | 2.884093                | -2.287245 | 0.038255  |

## Supporting information

|    |   |           |           |           |
|----|---|-----------|-----------|-----------|
| 43 | 1 | 2.437842  | -2.853664 | 0.858690  |
| 44 | 1 | 3.845779  | -2.742195 | -0.228333 |
| 45 | 6 | 3.056610  | -0.846426 | 0.492772  |
| 46 | 6 | 4.653462  | 0.864023  | 1.359093  |
| 47 | 1 | 4.324919  | 1.563591  | 0.584376  |
| 48 | 6 | 1.347796  | 1.240279  | -2.366466 |
| 49 | 1 | 2.298057  | 1.077895  | -1.854380 |
| 50 | 1 | 1.545536  | 1.779954  | -3.300939 |
| 51 | 6 | 0.456022  | 2.049544  | -1.435098 |
| 52 | 6 | -0.198177 | 4.319061  | -0.653179 |
| 53 | 1 | -1.258897 | 4.057246  | -0.715221 |
| 54 | 6 | -3.011032 | -0.064348 | -1.677403 |
| 55 | 1 | -2.601180 | 0.914926  | -1.937476 |
| 56 | 1 | -3.951244 | -0.200227 | -2.226113 |
| 57 | 6 | -3.238978 | -0.067285 | -0.176922 |
| 58 | 6 | -4.839181 | 0.402431  | 1.672067  |
| 59 | 1 | -4.462661 | -0.478951 | 2.197773  |
| 60 | 6 | 0.392370  | -1.788191 | 2.879228  |
| 61 | 6 | 0.234474  | -0.281831 | 3.162616  |
| 62 | 1 | -1.238793 | 0.357460  | 2.002329  |
| 63 | 1 | -1.267737 | -3.421485 | 0.266254  |
| 64 | 6 | -4.349405 | 1.675625  | 2.371234  |
| 65 | 6 | 0.237607  | 4.336451  | 0.815611  |
| 66 | 6 | 4.099116  | 1.311154  | 2.713963  |
| 67 | 1 | -4.743653 | 1.688715  | 3.388718  |
| 68 | 1 | -3.258347 | 1.721305  | 2.414111  |
| 69 | 1 | -4.713415 | 2.561913  | 1.843421  |
| 70 | 6 | -6.403366 | 0.355177  | 1.645390  |
| 71 | 8 | -6.957417 | 0.270453  | 2.761663  |
| 72 | 8 | -6.935461 | 0.431930  | 0.501878  |
| 73 | 1 | 1.303195  | 4.573427  | 0.892895  |
| 74 | 1 | -0.329399 | 5.111126  | 1.335090  |
| 75 | 1 | 0.054096  | 3.372163  | 1.294795  |
| 76 | 6 | 0.008868  | 5.715791  | -1.326305 |
| 77 | 8 | 0.815048  | 5.747376  | -2.299233 |
| 78 | 8 | -0.637949 | 6.657285  | -0.819264 |
| 79 | 1 | 3.011945  | 1.411234  | 2.684025  |
| 80 | 1 | 4.369034  | 0.593808  | 3.494566  |
| 81 | 1 | 4.538387  | 2.279115  | 2.961573  |
| 82 | 6 | 6.219364  | 0.833476  | 1.368363  |
| 83 | 8 | 6.750963  | -0.291760 | 1.147604  |
| 84 | 8 | 6.776597  | 1.926270  | 1.604929  |
| 85 | 6 | -0.618933 | 0.003491  | 4.391369  |
| 86 | 1 | -0.636252 | 1.074161  | 4.607408  |
| 87 | 1 | -1.646117 | -0.345343 | 4.241509  |
| 88 | 1 | -0.200691 | -0.528159 | 5.247189  |
| 89 | 1 | 1.241373  | 0.115065  | 3.313980  |

-----  
E(RTPSSh) = -2343.2813551 Hartree  
Zero-point correction = 0.725710  
Thermal correction to Energy = 0.773966  
Thermal correction to Enthalpy = 0.774910

## Supporting information

Thermal correction to Gibbs Free Energy = 0.641985  
 Sum of electronic and zero-point Energies = -2342.555645  
 Sum of electronic and thermal Energies = -2342.507389  
 Sum of electronic and thermal Enthalpies = -2342.506445  
 Sum of electronic and thermal Free Energies = -2342.639370

### $\Lambda(\delta\delta\delta\delta)$ , L-lactate•Yb<sub>3</sub>, 0 imaginary frequencies

| Center<br>Number | Atomic<br>Number | Coordinates (Angstroms) |           |           |
|------------------|------------------|-------------------------|-----------|-----------|
|                  |                  | X                       | Y         | Z         |
| 1                | 70               | 0.079345                | -0.701331 | -0.295414 |
| 2                | 8                | 2.302191                | -0.600605 | 0.462209  |
| 3                | 8                | 0.171877                | 1.633967  | -0.218715 |
| 4                | 8                | -2.172762               | -0.221232 | 0.293305  |
| 5                | 8                | 0.021078                | 0.039370  | 2.010417  |
| 6                | 8                | -0.131706               | -2.385198 | 1.214080  |
| 7                | 8                | -0.453743               | -3.237036 | 3.268281  |
| 8                | 7                | 1.857922                | 0.003803  | -2.166999 |
| 9                | 7                | -1.100012               | 0.448486  | -2.373901 |
| 10               | 7                | -1.633264               | -2.328749 | -1.384103 |
| 11               | 7                | 1.243953                | -2.725084 | -1.296483 |
| 12               | 7                | 4.473698                | 0.048156  | 0.353610  |
| 13               | 1                | 5.219746                | 0.588351  | -0.101321 |
| 14               | 7                | -0.520197               | 3.710721  | -0.819026 |
| 15               | 1                | -1.166517               | 4.316891  | -1.342710 |
| 16               | 7                | -4.334773               | -0.860927 | 0.586504  |
| 17               | 1                | -5.055674               | -1.592997 | 0.541535  |
| 18               | 6                | 1.243834                | 0.954737  | -3.134309 |
| 19               | 1                | 1.228207                | 1.942669  | -2.671425 |
| 20               | 1                | 1.855627                | 1.039269  | -4.041967 |
| 21               | 6                | -0.164211               | 0.534171  | -3.531144 |
| 22               | 1                | -0.141199               | -0.444860 | -4.012350 |
| 23               | 1                | -0.551919               | 1.243971  | -4.273977 |
| 24               | 6                | -2.303199               | -0.338987 | -2.775724 |
| 25               | 1                | -3.120442               | -0.071590 | -2.106441 |
| 26               | 1                | -2.620501               | -0.067577 | -3.790623 |
| 27               | 6                | -2.049250               | -1.841077 | -2.729436 |
| 28               | 1                | -1.263052               | -2.105215 | -3.437409 |
| 29               | 1                | -2.958168               | -2.363911 | -3.055288 |
| 30               | 6                | -1.016753               | -3.684283 | -1.497344 |
| 31               | 1                | -0.948373               | -4.082088 | -0.483799 |
| 32               | 1                | -1.652029               | -4.352441 | -2.092682 |
| 33               | 6                | 0.379944                | -3.625330 | -2.095689 |
| 34               | 1                | 0.360021                | -3.255488 | -3.123310 |
| 35               | 1                | 0.793853                | -4.639664 | -2.133065 |
| 36               | 6                | 2.520349                | -2.416803 | -1.984211 |
| 37               | 1                | 3.283808                | -2.239190 | -1.227759 |
| 38               | 1                | 2.859442                | -3.265356 | -2.590239 |
| 39               | 6                | 2.345085                | -1.204949 | -2.893542 |

## Supporting information

|    |   |           |           |           |
|----|---|-----------|-----------|-----------|
| 40 | 1 | 1.610227  | -1.442302 | -3.665013 |
| 41 | 1 | 3.289603  | -0.980938 | -3.406288 |
| 42 | 6 | 2.972138  | 0.667118  | -1.457571 |
| 43 | 1 | 3.875025  | 0.729818  | -2.077229 |
| 44 | 1 | 2.656614  | 1.684010  | -1.210763 |
| 45 | 6 | 3.249169  | -0.023941 | -0.134001 |
| 46 | 6 | 4.913971  | -0.386497 | 1.681829  |
| 47 | 1 | 4.197045  | -0.026283 | 2.426051  |
| 48 | 6 | -1.510786 | 1.801610  | -1.937425 |
| 49 | 1 | -1.663221 | 2.475283  | -2.788950 |
| 50 | 1 | -2.459637 | 1.708716  | -1.404383 |
| 51 | 6 | -0.535353 | 2.397483  | -0.934423 |
| 52 | 6 | 0.145876  | 4.500140  | 0.221200  |
| 53 | 1 | -0.048380 | 4.036195  | 1.193238  |
| 54 | 6 | -2.796102 | -2.409693 | -0.472371 |
| 55 | 1 | -3.677930 | -2.826902 | -0.973127 |
| 56 | 1 | -2.524198 | -3.073076 | 0.352608  |
| 57 | 6 | -3.101594 | -1.062626 | 0.159004  |
| 58 | 6 | -4.810627 | 0.238137  | 1.431263  |
| 59 | 1 | -4.101909 | 0.383088  | 2.252760  |
| 60 | 6 | -0.324473 | -2.291617 | 2.490437  |
| 61 | 6 | -0.433781 | -0.859921 | 3.048251  |
| 62 | 1 | -0.315260 | 0.932999  | 2.160416  |
| 63 | 1 | 1.447138  | -3.193590 | -0.413765 |
| 64 | 6 | -4.975992 | 1.553490  | 0.665377  |
| 65 | 6 | 1.657112  | 4.615546  | 0.005416  |
| 66 | 6 | 5.035799  | -1.909960 | 1.787722  |
| 67 | 6 | 0.360443  | -0.660133 | 4.332091  |
| 68 | 1 | 0.209593  | 0.348099  | 4.726577  |
| 69 | 1 | 1.427149  | -0.812310 | 4.148267  |
| 70 | 1 | 0.024825  | -1.384153 | 5.076645  |
| 71 | 1 | -1.498742 | -0.673186 | 3.227934  |
| 72 | 1 | -5.433267 | 2.284926  | 1.333844  |
| 73 | 1 | -4.013072 | 1.939941  | 0.324186  |
| 74 | 1 | -5.629862 | 1.412540  | -0.200322 |
| 75 | 6 | -6.175006 | -0.236923 | 2.036357  |
| 76 | 8 | -6.711933 | 0.557484  | 2.837633  |
| 77 | 8 | -6.592462 | -1.363113 | 1.643916  |
| 78 | 1 | 1.872005  | 5.024143  | -0.986423 |
| 79 | 1 | 2.060507  | 5.295142  | 0.758072  |
| 80 | 1 | 2.148867  | 3.645173  | 0.103766  |
| 81 | 6 | -0.538439 | 5.909075  | 0.198994  |
| 82 | 8 | -1.411820 | 6.084238  | -0.697417 |
| 83 | 8 | -0.137496 | 6.714435  | 1.065548  |
| 84 | 1 | 4.065980  | -2.395242 | 1.655746  |
| 85 | 1 | 5.727928  | -2.289503 | 1.029939  |
| 86 | 1 | 5.429240  | -2.158744 | 2.774857  |
| 87 | 6 | 6.291370  | 0.309929  | 1.938598  |
| 88 | 8 | 6.758174  | 0.984055  | 0.977136  |
| 89 | 8 | 6.790894  | 0.112572  | 3.067345  |

-----  
E(RTPSSh) = -2343.2837707 Hartree



## Supporting information

Zero-point correction = 0.724919  
Thermal correction to Energy = 0.773611  
Thermal correction to Enthalpy = 0.774556  
Thermal correction to Gibbs Free Energy = 0.639201  
Sum of electronic and zero-point Energies = -2342.558852  
Sum of electronic and thermal Energies = -2342.510159  
Sum of electronic and thermal Enthalpies = -2342.509215  
Sum of electronic and thermal Free Energies = -2342.644570

### $\Delta(\lambda\lambda\lambda\lambda)$ , L-lactate•Yb<sub>3</sub>, 0 imaginary frequencies

| Center<br>Number | Atomic<br>Number | Coordinates (Angstroms) |           |           |
|------------------|------------------|-------------------------|-----------|-----------|
|                  |                  | X                       | Y         | Z         |
| 1                | 70               | -0.044260               | -0.677521 | -0.272061 |
| 2                | 8                | -2.290379               | -0.608653 | 0.412503  |
| 3                | 8                | -0.121073               | 1.636099  | 0.059421  |
| 4                | 8                | 2.189012                | -0.312747 | 0.449515  |
| 5                | 8                | -0.049413               | -0.242031 | 2.123332  |
| 6                | 8                | 0.077949                | -2.547152 | 1.007433  |
| 7                | 8                | 0.306385                | -3.674759 | 2.937452  |
| 8                | 7                | -1.738724               | 0.269890  | -2.129463 |
| 9                | 7                | 1.235006                | 0.682347  | -2.160837 |
| 10               | 7                | 1.694675                | -2.192216 | -1.493283 |
| 11               | 7                | -1.191050               | -2.547557 | -1.563793 |
| 12               | 7                | -4.456447               | 0.055651  | 0.261461  |
| 13               | 1                | -5.218711               | 0.471643  | -0.286421 |
| 14               | 7                | 0.489904                | 3.773407  | -0.400666 |
| 15               | 1                | 0.984520                | 4.449546  | -0.997281 |
| 16               | 7                | 4.368732                | -0.936182 | 0.611832  |
| 17               | 1                | 5.144123                | -1.533855 | 0.299505  |
| 18               | 6                | -1.071932               | 1.311720  | -2.957486 |
| 19               | 1                | -1.069333               | 2.244008  | -2.390898 |
| 20               | 1                | -1.640000               | 1.503186  | -3.877171 |
| 21               | 6                | 0.349019                | 0.918298  | -3.336932 |
| 22               | 1                | 0.337957                | 0.002264  | -3.929596 |
| 23               | 1                | 0.775636                | 1.703411  | -3.975454 |
| 24               | 6                | 2.446417                | -0.064605 | -2.609492 |
| 25               | 1                | 3.242193                | 0.114977  | -1.886815 |
| 26               | 1                | 2.802589                | 0.320962  | -3.573488 |
| 27               | 6                | 2.178160                | -1.558640 | -2.750993 |
| 28               | 1                | 1.422048                | -1.727477 | -3.518328 |
| 29               | 1                | 3.096552                | -2.052879 | -3.094868 |
| 30               | 6                | 1.064358                | -3.511898 | -1.792993 |
| 31               | 1                | 0.946613                | -4.025775 | -0.837956 |
| 32               | 1                | 1.714330                | -4.116371 | -2.438398 |
| 33               | 6                | -0.304684               | -3.353990 | -2.435525 |
| 34               | 1                | -0.237391               | -2.858839 | -3.406882 |
| 35               | 1                | -0.728442               | -4.348571 | -2.617295 |
| 36               | 6                | -2.439791               | -2.141736 | -2.250051 |

## Supporting information

|    |   |           |           |           |
|----|---|-----------|-----------|-----------|
| 37 | 1 | -3.224326 | -2.038899 | -1.501035 |
| 38 | 1 | -2.771273 | -2.909172 | -2.959536 |
| 39 | 6 | -2.220511 | -0.836309 | -3.006946 |
| 40 | 1 | -1.467562 | -0.995584 | -3.781132 |
| 41 | 1 | -3.146180 | -0.537458 | -3.516099 |
| 42 | 6 | -2.868280 | 0.868712  | -1.386333 |
| 43 | 1 | -3.745835 | 1.022056  | -2.026213 |
| 44 | 1 | -2.548251 | 1.842701  | -1.007822 |
| 45 | 6 | -3.207847 | 0.032457  | -0.165447 |
| 46 | 6 | -5.002974 | -0.656514 | 1.418269  |
| 47 | 1 | -4.624398 | -1.682921 | 1.410574  |
| 48 | 6 | -4.630239 | 0.016802  | 2.743196  |
| 49 | 1 | -3.548475 | 0.019551  | 2.894421  |
| 50 | 1 | -5.105123 | -0.530976 | 3.559169  |
| 51 | 1 | -4.990937 | 1.049727  | 2.758926  |
| 52 | 6 | 1.638830  | 1.968252  | -1.547066 |
| 53 | 1 | 1.876449  | 2.725134  | -2.304014 |
| 54 | 1 | 2.535793  | 1.789146  | -0.950097 |
| 55 | 6 | 0.585805  | 2.470692  | -0.573850 |
| 56 | 6 | -0.439883 | 4.486582  | 0.479046  |
| 57 | 1 | -1.446635 | 4.085602  | 0.326637  |
| 58 | 6 | -0.062066 | 4.367757  | 1.958014  |
| 59 | 1 | -0.132258 | 3.334070  | 2.303726  |
| 60 | 1 | -0.748356 | 4.985026  | 2.539995  |
| 61 | 1 | 0.957957  | 4.727800  | 2.121395  |
| 62 | 6 | 2.814705  | -2.401048 | -0.548172 |
| 63 | 1 | 3.703867  | -2.798431 | -1.052488 |
| 64 | 1 | 2.486812  | -3.129005 | 0.198110  |
| 65 | 6 | 3.125910  | -1.121915 | 0.208072  |
| 66 | 6 | 4.899251  | 0.216364  | 1.343792  |
| 67 | 1 | 4.524852  | 1.133388  | 0.878998  |
| 68 | 6 | 4.512112  | 0.201948  | 2.825462  |
| 69 | 1 | 3.431258  | 0.294871  | 2.953571  |
| 70 | 1 | 5.002558  | 1.041582  | 3.320920  |
| 71 | 1 | 4.845922  | -0.726706 | 3.297712  |
| 72 | 6 | 0.227404  | -2.630621 | 2.290240  |
| 73 | 6 | 0.356788  | -1.290382 | 3.037579  |
| 74 | 1 | 0.352626  | 0.597655  | 2.382448  |
| 75 | 1 | -1.428693 | -3.117823 | -0.752499 |
| 76 | 6 | 6.453380  | 0.170627  | 1.163116  |
| 77 | 8 | 7.079785  | 1.133006  | 1.656108  |
| 78 | 8 | 6.908604  | -0.837283 | 0.551685  |
| 79 | 6 | -0.425875 | 5.978800  | 0.004879  |
| 80 | 8 | -1.219809 | 6.738428  | 0.599300  |
| 81 | 8 | 0.392860  | 6.256840  | -0.916863 |
| 82 | 6 | -6.554250 | -0.692781 | 1.220555  |
| 83 | 8 | -7.189653 | -1.346908 | 2.075392  |
| 84 | 8 | -7.000700 | -0.045120 | 0.231480  |
| 85 | 6 | -0.457512 | -1.242582 | 4.322991  |
| 86 | 1 | -0.291192 | -0.299792 | 4.850790  |
| 87 | 1 | -1.523641 | -1.343297 | 4.105126  |
| 88 | 1 | -0.152299 | -2.067408 | 4.969230  |

## Supporting information

89                      1                      1.421852      -1.161720      3.260391

E(RTPSSh) = -2343.284795 Hartree  
 Zero-point correction = 0.725903  
 Thermal correction to Energy = 0.774254  
 Thermal correction to Enthalpy = 0.775198  
 Thermal correction to Gibbs Free Energy = 0.642092  
 Sum of electronic and zero-point Energies = -2342.558892  
 Sum of electronic and thermal Energies = -2342.510541  
 Sum of electronic and thermal Enthalpies = -2342.509597  
 Sum of electronic and thermal Free Energies = -2342.642703

$\Lambda(\lambda\lambda\lambda\lambda)$ , L-lactate•Yb<sub>3</sub>, 0 imaginary frequencies

| Center<br>Number | Atomic<br>Number | Coordinates (Angstroms) |           |           |
|------------------|------------------|-------------------------|-----------|-----------|
|                  |                  | X                       | Y         | Z         |
| 1                | 70               | 0.159420                | -0.887098 | -0.148587 |
| 2                | 8                | -2.073195               | -0.099249 | 0.076691  |
| 3                | 8                | 0.350310                | 1.330905  | -0.908106 |
| 4                | 8                | 2.317576                | -0.401347 | 0.696805  |
| 5                | 8                | 0.048716                | 0.692322  | 1.735706  |
| 6                | 8                | -0.274577               | -1.839357 | 1.856947  |
| 7                | 8                | -0.421343               | -1.895492 | 4.097492  |
| 8                | 7                | -1.761169               | -2.520583 | -0.952321 |
| 9                | 7                | -0.453441               | -0.493203 | -2.687325 |
| 10               | 7                | 2.230717                | -1.342949 | -1.801725 |
| 11               | 7                | 0.917352                | -3.312548 | -0.144421 |
| 12               | 7                | -4.167321               | -0.522343 | 0.847837  |
| 13               | 1                | -4.893891               | -1.193430 | 1.127073  |
| 14               | 7                | -0.708829               | 3.054373  | -1.938324 |
| 15               | 1                | -1.434348               | 3.394264  | -2.583196 |
| 16               | 7                | 4.394399                | 0.481452  | 0.438504  |
| 17               | 1                | 5.139821                | 0.835494  | -0.174097 |
| 18               | 6                | -2.348967               | -2.067249 | -2.246989 |
| 19               | 1                | -3.050987               | -1.259233 | -2.033805 |
| 20               | 1                | -2.930629               | -2.876496 | -2.705672 |
| 21               | 6                | -1.294093               | -1.590744 | -3.235132 |
| 22               | 1                | -0.628573               | -2.415645 | -3.496491 |
| 23               | 1                | -1.788009               | -1.274171 | -4.163135 |
| 24               | 6                | 0.765768                | -0.321314 | -3.529450 |
| 25               | 1                | 1.160588                | 0.678491  | -3.339725 |
| 26               | 1                | 0.499063                | -0.362597 | -4.593382 |
| 27               | 6                | 1.830679                | -1.362563 | -3.230559 |
| 28               | 1                | 1.459134                | -2.362204 | -3.459666 |
| 29               | 1                | 2.697522                | -1.191089 | -3.881934 |
| 30               | 6                | 2.887628                | -2.630925 | -1.435672 |
| 31               | 1                | 3.454328                | -2.467803 | -0.515706 |
| 32               | 1                | 3.601180                | -2.932196 | -2.213178 |

## Supporting information

|    |   |           |           |           |
|----|---|-----------|-----------|-----------|
| 33 | 6 | 1.866406  | -3.731221 | -1.198439 |
| 34 | 1 | 1.299328  | -3.938043 | -2.108521 |
| 35 | 1 | 2.384953  | -4.657639 | -0.925829 |
| 36 | 6 | -0.235871 | -4.237029 | -0.003741 |
| 37 | 1 | -0.636425 | -4.089406 | 0.999235  |
| 38 | 1 | 0.078974  | -5.283055 | -0.098491 |
| 39 | 6 | -1.292343 | -3.928311 | -1.055631 |
| 40 | 1 | -0.875800 | -4.064055 | -2.055791 |
| 41 | 1 | -2.134068 | -4.625938 | -0.961568 |
| 42 | 6 | -2.784374 | -2.386396 | 0.105832  |
| 43 | 1 | -2.395254 | -2.822177 | 1.029275  |
| 44 | 1 | -3.720017 | -2.893632 | -0.160242 |
| 45 | 6 | -3.006067 | -0.902247 | 0.352259  |
| 46 | 6 | -4.538136 | 0.822956  | 1.295414  |
| 47 | 1 | -3.743069 | 1.211438  | 1.939366  |
| 48 | 6 | -4.768640 | 1.792260  | 0.131793  |
| 49 | 1 | -3.847240 | 1.973265  | -0.426075 |
| 50 | 1 | -5.130302 | 2.737855  | 0.539335  |
| 51 | 1 | -5.525122 | 1.394480  | -0.551487 |
| 52 | 6 | -1.186631 | 0.789767  | -2.682696 |
| 53 | 1 | -2.180091 | 0.638143  | -2.256727 |
| 54 | 1 | -1.303023 | 1.196978  | -3.694696 |
| 55 | 6 | -0.452284 | 1.772625  | -1.779573 |
| 56 | 6 | -0.263563 | 4.150663  | -1.073908 |
| 57 | 1 | -0.397042 | 3.849313  | -0.030378 |
| 58 | 6 | 1.201739  | 4.525152  | -1.313860 |
| 59 | 1 | 1.867798  | 3.696182  | -1.063360 |
| 60 | 1 | 1.447170  | 5.384147  | -0.687104 |
| 61 | 1 | 1.358648  | 4.800549  | -2.361100 |
| 62 | 6 | 3.169920  | -0.235537 | -1.537563 |
| 63 | 1 | 2.759726  | 0.689977  | -1.949981 |
| 64 | 1 | 4.151404  | -0.409909 | -1.995819 |
| 65 | 6 | 3.285887  | -0.053154 | -0.033242 |
| 66 | 6 | 4.655698  | 0.884421  | 1.822423  |
| 67 | 1 | 3.782075  | 1.420902  | 2.204558  |
| 68 | 6 | 4.957321  | -0.313110 | 2.729234  |
| 69 | 1 | 4.099384  | -0.986294 | 2.793152  |
| 70 | 1 | 5.197472  | 0.057732  | 3.727210  |
| 71 | 1 | 5.817296  | -0.871626 | 2.347541  |
| 72 | 6 | -0.210281 | -1.308184 | 3.037015  |
| 73 | 6 | 0.214494  | 0.170576  | 3.074338  |
| 74 | 1 | 0.623800  | 1.458354  | 1.604714  |
| 75 | 1 | 1.409857  | -3.313764 | 0.748968  |
| 76 | 6 | 5.867066  | 1.873446  | 1.770540  |
| 77 | 8 | 6.183538  | 2.392179  | 2.862634  |
| 78 | 8 | 6.404797  | 2.029538  | 0.637717  |
| 79 | 6 | -1.220668 | 5.353667  | -1.367206 |
| 80 | 8 | -1.017055 | 6.381624  | -0.687026 |
| 81 | 8 | -2.089653 | 5.161917  | -2.265200 |
| 82 | 6 | -5.833077 | 0.654512  | 2.159134  |
| 83 | 8 | -6.273496 | 1.703340  | 2.677064  |
| 84 | 8 | -6.301041 | -0.517058 | 2.232698  |

## Supporting information

|    |   |           |          |          |
|----|---|-----------|----------|----------|
| 85 | 6 | -0.571291 | 0.992940 | 4.086264 |
| 86 | 1 | -0.203512 | 2.021842 | 4.116868 |
| 87 | 1 | -1.633201 | 1.004645 | 3.827586 |
| 88 | 1 | -0.457148 | 0.547777 | 5.076223 |
| 89 | 1 | 1.282360  | 0.181465 | 3.320681 |

-----

E(RTPSSh) = -2343.2814821 Hartree  
 Zero-point correction = 0.725316  
 Thermal correction to Energy = 0.773884  
 Thermal correction to Enthalpy = 0.774828  
 Thermal correction to Gibbs Free Energy = 0.640017  
 Sum of electronic and zero-point Energies = -2342.556166  
 Sum of electronic and thermal Energies = -2342.507598  
 Sum of electronic and thermal Enthalpies = -2342.506654  
 Sum of electronic and thermal Free Energies = -2342.641466

### $\Delta(\delta\delta\delta\delta)$ , L-lactate•Yb<sub>3</sub>, 0 imaginary frequencies

-----

| Center<br>Number | Atomic<br>Number | Coordinates (Angstroms) |           |           |
|------------------|------------------|-------------------------|-----------|-----------|
|                  |                  | X                       | Y         | Z         |
| 1                | 70               | -0.100184               | -0.807033 | -0.224939 |
| 2                | 8                | 2.129000                | -0.139280 | 0.288157  |
| 3                | 8                | -0.207198               | 1.519464  | -0.551811 |
| 4                | 8                | -2.308370               | -0.423292 | 0.567893  |
| 5                | 8                | -0.103261               | 0.370170  | 1.941953  |
| 6                | 8                | 0.179134                | -2.141275 | 1.585433  |
| 7                | 8                | 0.100465                | -2.637734 | 3.775078  |
| 8                | 7                | 1.831072                | -2.315415 | -1.201861 |
| 9                | 7                | 0.681658                | 0.040999  | -2.603216 |
| 10               | 7                | -2.062810               | -0.899067 | -2.060015 |
| 11               | 7                | -0.908282               | -3.176834 | -0.722012 |
| 12               | 7                | 4.217513                | -0.742505 | 0.961197  |
| 13               | 1                | 4.992377                | -1.416985 | 0.924802  |
| 14               | 7                | 0.772297                | 3.415840  | -1.325871 |
| 15               | 1                | 1.316437                | 3.901053  | -2.049954 |
| 16               | 7                | -4.414836               | 0.396930  | 0.317854  |
| 17               | 1                | -5.205776               | 0.624337  | -0.297480 |
| 18               | 6                | 2.517569                | -1.644124 | -2.344598 |
| 19               | 1                | 3.216354                | -0.911280 | -1.937264 |
| 20               | 1                | 3.115144                | -2.370192 | -2.909480 |
| 21               | 6                | 1.543374                | -0.957794 | -3.290088 |
| 22               | 1                | 0.884024                | -1.698639 | -3.745069 |
| 23               | 1                | 2.105864                | -0.487146 | -4.107052 |
| 24               | 6                | -0.476928               | 0.392133  | -3.474625 |
| 25               | 1                | -0.872858               | 1.350271  | -3.131253 |
| 26               | 1                | -0.141979               | 0.538544  | -4.509456 |
| 27               | 6                | -1.571322               | -0.660951 | -3.439465 |
| 28               | 1                | -1.197860               | -1.608797 | -3.829596 |

## Supporting information

|    |   |           |           |           |
|----|---|-----------|-----------|-----------|
| 29 | 1 | -2.392805 | -0.350385 | -4.098291 |
| 30 | 6 | -2.769403 | -2.211534 | -1.990869 |
| 31 | 1 | -3.401036 | -2.204963 | -1.099191 |
| 32 | 1 | -3.428891 | -2.337655 | -2.858770 |
| 33 | 6 | -1.791906 | -3.370085 | -1.891535 |
| 34 | 1 | -1.170575 | -3.435002 | -2.787075 |
| 35 | 1 | -2.349187 | -4.311339 | -1.820961 |
| 36 | 6 | 0.220865  | -4.140677 | -0.693737 |
| 37 | 1 | 0.558522  | -4.202405 | 0.340550  |
| 38 | 1 | -0.101701 | -5.140096 | -1.009207 |
| 39 | 6 | 1.345788  | -3.662925 | -1.602388 |
| 40 | 1 | 0.989226  | -3.591355 | -2.632336 |
| 41 | 1 | 2.169515  | -4.387893 | -1.598614 |
| 42 | 6 | 2.780161  | -2.413824 | -0.071349 |
| 43 | 1 | 2.306619  | -2.974544 | 0.737820  |
| 44 | 1 | 3.711079  | -2.917465 | -0.359902 |
| 45 | 6 | 3.040762  | -1.000911 | 0.424212  |
| 46 | 6 | 4.723078  | 0.558246  | 1.406514  |
| 47 | 1 | 4.447483  | 1.313867  | 0.664787  |
| 48 | 6 | 1.421567  | 1.286746  | -2.308714 |
| 49 | 1 | 2.363310  | 1.040470  | -1.814398 |
| 50 | 1 | 1.643888  | 1.856712  | -3.219413 |
| 51 | 6 | 0.597253  | 2.111211  | -1.328821 |
| 52 | 6 | 0.077463  | 4.394615  | -0.486137 |
| 53 | 1 | -0.985354 | 4.138693  | -0.455147 |
| 54 | 6 | -3.003032 | 0.162716  | -1.648261 |
| 55 | 1 | -2.542393 | 1.138821  | -1.820126 |
| 56 | 1 | -3.943340 | 0.120575  | -2.212283 |
| 57 | 6 | -3.241378 | 0.025799  | -0.153974 |
| 58 | 6 | -4.877318 | 0.316900  | 1.705065  |
| 59 | 1 | -4.569972 | -0.645583 | 2.123833  |
| 60 | 6 | -0.009272 | -1.852443 | 2.834197  |
| 61 | 6 | -0.457833 | -0.407113 | 3.111457  |
| 62 | 1 | -0.642901 | 1.171452  | 1.902631  |
| 63 | 1 | -1.455196 | -3.333620 | 0.124290  |
| 64 | 6 | -4.325832 | 1.454914  | 2.569518  |
| 65 | 6 | 0.638845  | 4.438442  | 0.938970  |
| 66 | 6 | 4.180757  | 0.969414  | 2.778485  |
| 67 | 6 | 0.147262  | 0.181664  | 4.376836  |
| 68 | 1 | -0.239772 | 1.187677  | 4.559314  |
| 69 | 1 | 1.235901  | 0.229596  | 4.297236  |
| 70 | 1 | -0.112944 | -0.454617 | 5.224516  |
| 71 | 1 | -1.550954 | -0.433997 | 3.187261  |
| 72 | 1 | -4.746768 | 1.367963  | 3.572654  |
| 73 | 1 | -3.236296 | 1.411786  | 2.636380  |
| 74 | 1 | -4.612953 | 2.424097  | 2.151238  |
| 75 | 6 | -6.440723 | 0.365931  | 1.648198  |
| 76 | 8 | -7.023227 | 0.210287  | 2.742538  |
| 77 | 8 | -6.944594 | 0.576436  | 0.508623  |
| 78 | 1 | 1.705210  | 4.682101  | 0.919764  |
| 79 | 1 | 0.113320  | 5.214861  | 1.497697  |
| 80 | 1 | 0.508418  | 3.480784  | 1.448408  |

## Supporting information

|    |   |           |           |           |
|----|---|-----------|-----------|-----------|
| 81 | 6 | 0.243170  | 5.778229  | -1.197330 |
| 82 | 8 | 1.000426  | 5.791700  | -2.208813 |
| 83 | 8 | -0.378695 | 6.727739  | -0.674710 |
| 84 | 1 | 3.099213  | 1.116312  | 2.750384  |
| 85 | 1 | 4.414788  | 0.204994  | 3.525564  |
| 86 | 1 | 4.661353  | 1.904076  | 3.073387  |
| 87 | 6 | 6.283219  | 0.432541  | 1.433763  |
| 88 | 8 | 6.749863  | -0.716518 | 1.190601  |
| 89 | 8 | 6.901825  | 1.482912  | 1.708936  |

-----  
E(RTPSSh) = -2343.2804807 Hartree  
Zero-point correction = 0.725264  
Thermal correction to Energy = 0.773767  
Thermal correction to Enthalpy = 0.774712  
Thermal correction to Gibbs Free Energy = 0.641352  
Sum of electronic and zero-point Energies = -2342.555216  
Sum of electronic and thermal Energies = -2342.506713  
Sum of electronic and thermal Enthalpies = -2342.505769  
Sum of electronic and thermal Free Energies = -2342.639129

## References

- (1) Djanashvili, K.; Peters, J. A. *Contrast Media Mol. Imaging* **2007**, *2*, 67.
- (2) Wu, Y.; Soesbe, T. C.; Kiefer, G. E.; Zhao, P.; Sherry, A. D. *J. Am. Chem. Soc.* **2010**, *132*, 14002.
- (3) Tao, J. M.; Perdew, J. P.; Staroverov, V. N.; Scuseria, G. E. *Phys. Rev. Lett.* **2003**, *91*, 146401.
- (4) Frisch, M. J.; Trucks, G. W.; Schlegel, H. B.; Scuseria, G. E.; Robb, M. A.; Cheeseman, J. R.; Scalmani, G.; Barone, V.; Mennucci, B.; Petersson, G. A.; Nakatsuji, H.; Caricato, M.; Li, X.; Hratchian, H. P.; Izmaylov, A. F.; Bloino, J.; Zheng, G.; Sonnenberg, J. L.; Hada, M.; Ehara, M.; Toyota, K.; Fukuda, R.; Hasegawa, J.; Ishida, M.; Nakajima, T.; Honda, Y.; Kitao, O.; Nakai, H.; Vreven, T.; Montgomery, J. A.; Peralta, J. E.; Ogliaro, F.; Bearpark, M.; Heyd, J. J.; Brothers, E.; Kudin, K. N.; Staroverov, V. N.; Kobayashi, R.; Normand, J.; Raghavachari, K.; Rendell, A.; Burant, J. C.; Iyengar, S. S.; Tomasi, J.; Cossi, M.; Rega, N.; Millam, J. M.; Klene, M.; Knox, J. E.; Cross, J. B.; Bakken, V.; Adamo, C.; Jaramillo, J.; Gomperts, R.; Stratmann, R. E.; Yazyev, O.; Austin, A. J.; Cammi, R.; Pomelli, C.; Ochterski, J. W.; Martin, R. L.; Morokuma, K.; Zakrzewski, V. G.; Voth, G. A.; Salvador, P.; Dannenberg, J. J.; Dapprich, S.; Daniels, A. D.; Farkas, Foresman, J. B.; Ortiz, J. V.; Cioslowski, J.; Fox, D. J. *Gaussian 09, Revision B.01*, Gaussian, Inc.: Wallingford CT, 2009.
- (5) Dolg, M.; Stoll, H.; Savin, A. *Theor. Chim. Acta* **1989**, *75*, 173-194.
- (6) Tomasi, J.; Mennucci, B.; Cammi, R. *Chem. Rev.* **2005**, *105*, 2999-3093.
